# Supplementary material for: Synthesis and investigation of new cyclic molecules using the stilbene scaffold
Source: Royal Society of Chemistry journal article supplement (doi:10.1039/c8ra04249g), 2018-01-01

## Synthesis and investigation of new cyclic molecules using the stilben scaffold

Piotr Tobiasz, Marcin Poterała, Eliza Jaśkowska and Hanna Krawczyk\*

Department of Organic Chemistry, Faculty of Chemistry, Warsaw University of Technology, Noakowskiego 3, 00-664 Warsaw, Poland. [hkraw@ch.pw.edu.pl](mailto:hkraw@ch.pw.edu.pl)

### Experimental section.

Substrate (**1**, **2**, **4**) are commercially available from Sigma-Aldrich, compound (**3**) was synthesized according to literature procedures [Krawczyk, H.; et al, *BioMed Research International* Volume **2014**, Article ID 320895, 8 pages, <http://dx.doi.org/10.1155/2014/320895> and (**5**) was prepared according to modified literature procedures: [Hattori, T. et al, *Chem. Eur. J.*, 2017, 23, 8196 – 8202]:

**Synthesis of (5)** THF (100.0 mL), titanium tetrachloride (13.62 g, 7.86 mL, 71.8 mmol) was added dropwise. The mixture was stirred at 0 °C for 0.5 hour and then aldehyde (59.8 mmol) was slowly added. The suspension was refluxed for 24 h under argon, then cooled to 0 °C and diluted with cold water (200 mL). Zinc dust and precipitated stilben were filtered off, washed with distilled water (2x50 ml) and methanol (2x25 ml) and vacuum dried. After recrystallization and hot filtration, pure stilben was obtained. (*E*)-4,4'-dimethoxystilben, crystallized from toluene/ethyl acetate, Yield 68%; <sup>1</sup>H NMR (500 MHz, CDCl<sub>3</sub>, 298 K): δ (ppm): 7.41-7.44 (m, 4H, Ar), 6.93 (s, 2H, CH=CH), 6.88-6.91 (m, 4H, Ar), 3.83 (s, 6H, CH<sub>3</sub>O). <sup>13</sup>C NMR (125 MHz, CDCl<sub>3</sub>, 298 K): δ (ppm): 159.2, 130.6, 127.6, 126.3, 114.3, 55.5.

**Synthesis of (6)**; 2 g (3,90 mmol) [(4-bromobenzyl)] triphenylphosphonium bromide in 20 ml distilled water, 326 mg (13.58 mmol) lithium hydroxide were slowly sequentially added to a three-necked flask (250 mL) during at for 30 min under nitrogen atmosphere and the mixture was stirred. After 2 min was slowly added 660 mg (3.36 mmol) 3,4,5-trimethoxybenzaldehyde. The mixture was stirred at 100 °C for 24 h. Next was added to mixture of 160 mL of water and extracted with chloroform. The organic layer was dried over anhydrous MgSO<sub>4</sub> and concentrated in vacuo. The residue was purified by flash column chromatography on silica gel (hexane : ethanol 9:1). Yield 47%, 550 mg; <sup>1</sup>H NMR (500 MHz, CDCl<sub>3</sub>, 298 K): δ (ppm): 7.48 (2H, d, *J*=8.5 Hz, H2', H6'); 7.36 (2H, d, *J*=8.5 Hz, H3', H5'); 7.02 (1H, AB spin system, *J*= -16 Hz, Hα); 6.93 (1H, AB spin system, Hβ); 6.73 (2H, s, H2, H6); 3.92 (6H, s, 2-OCH<sub>3</sub>); 3.87 (3H, s, -OCH<sub>3</sub>). <sup>13</sup>C NMR (125 MHz, CDCl<sub>3</sub>, 298 K): δ (ppm): 153.42 (C3, C5); 138.19 (C4); 136.15 (C1'); 132.65 (C1); 131.78 (C3', C5'); 129.35 (Cα); 127.85 (C2', C6'); 126.86 (Cβ); 121.25 (C4'); 103.65 (C2, C6); 60.95 (-OCH<sub>3</sub>); 56.13 (2-OCH<sub>3</sub>). HRMS (ESI): C<sub>17</sub>H<sub>17</sub>O<sub>3</sub>NaBr (M+Na)<sup>+</sup>, calcd *m/z* 371.0259; found *m/z* 371.0257.

Substrate (**14**) was synthesized according to literature procedures [Krawczyk, H.; et al, *Tetrahedron* **2016**, 72, 3877).

**General procedure of synthesis of compounds (7-11, 15, 16)** (Table 1 in the text): (*E*)-stilbenes (**1-6**) or dibenzo[*b,f*]oxepin (**14a**) or dibenzo[*b,f*]oxepin (**14a**) and 4,4'-diethoxy-1,1'-biphenyl (**14b**) (1 mmol), and paraformaldehyde (1 mmol) in dichloromethane (15 ml), were sequentially added to a three-necked flask (25 mL). The mixture was stirred at for 30 min under nitrogen atmosphere. The reaction flask was capped and nitrogen bubbled through the solution for 30 minutes. Then, boron trifluoride diethyl etherate [BF<sub>3</sub>·O(C<sub>2</sub>H<sub>5</sub>)<sub>2</sub>, 0.25 mL, 2 mmol] was added to the solution and the mixture was stirred at room temperature for 3 h. The solution was poured into methanol (15ml) and washed with water. The organic layer was dried over anhydrous MgSO<sub>4</sub> and concentrated in vacuo. The residue was purified by flash column chromatography on silica gel (eluent: CH<sub>2</sub>Cl<sub>2</sub>). **The procedure of synthesis of compounds (12 and 13)** is analogical but without paraformaldehyde.

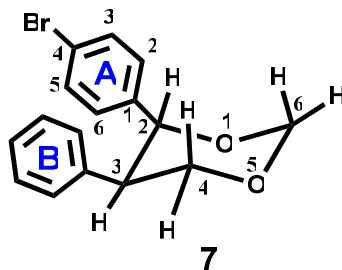

**(7)**: Oil, yield: 80 mg (25%). <sup>1</sup>H NMR (500 MHz, CDCl<sub>3</sub>, 298 K): δ (ppm): **the tetrahydropyran ring**: 5.32 (1H, AB spin system, <sup>2</sup>J = -6 Hz, H6), 4.99 (1H, AB spin system, H6'), 4.66 (1H, d, <sup>3</sup>J = 10.5 Hz, H2), 3.19 (1H, ddd, <sup>3</sup>J = 11 Hz, J = 4.5 Hz, H3), 4.22 (1H, AB spin system, dd, <sup>2</sup>J = -11 Hz, <sup>3</sup>J = 4.5 Hz, H4), 3.91 (AB spin system, t, <sup>2</sup>J = 11 Hz, H4'); **A ring**: 6.88 (1H, d, <sup>3</sup>J = 8.5 Hz, H2,H6), 7.32 (1H, d, H3, H5); **B ring**: 6.99 (2H, d, <sup>3</sup>J = 8.5 Hz, H2, H6), 7.13 (2H, dd, <sup>3</sup>J = 4 Hz, H3, H5), 7.20 (1H, d, H4). <sup>13</sup>C NMR (125 MHz, CDCl<sub>3</sub>, 298 K): δ (ppm): **the tetrahydropyran ring**: 84.10(C2), 48.72(C3), 71.67(C4), 94.19(C6), **A ring**: 136.19(C1), 130.00(C2,C6), 131.64(C3,C5), 121.10(C4); **B ring**: 138.73(C1), 128.62(C2,C6), 126.99 (C3,C5), 128.18(C4). HRMS (ESI): C<sub>16</sub>H<sub>15</sub>BrO<sub>2</sub>Na<sup>+</sup>, calcd *m/z* 341.0153; found *m/z* 341.0157.

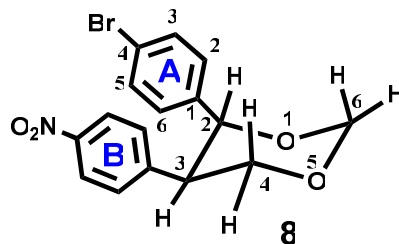

**(8)**: Oil, yield: 73 mg (20%). <sup>1</sup>H NMR (500 MHz, CDCl<sub>3</sub>, 298 K): δ (ppm): **the tetrahydropyran ring**: 5.33 (1H, AB spin system, <sup>2</sup>J = -7 Hz, H6), 5.00 (1H, AB spin system, H6'), 4.68 (1H, d, J = 10 Hz, H2), 3.27 (1H, td, <sup>3</sup>J = 11 Hz, <sup>3</sup>J = 4.5 Hz, H3), 4.24 (1H, AB spin system, dd, <sup>2</sup>J = -11 Hz, <sup>3</sup>J = 4.5 Hz, H4), 3.97 (1H, AB spin system, t, <sup>2</sup>J = -11 Hz, H4'); **A ring**: 6.98 (2H, d, <sup>3</sup>J = 8.5 Hz, H2,H6), 7.33 (2H, d, H3,H5); **B ring**:

7.17 (2H, d,  $^3J = 8.5$  Hz, H2,H6), 8.09 (2H, d, H3,H5);  $^{13}\text{C}$  NMR (125 MHz,  $\text{CDCl}_3$ , 298 K):  $\delta$  (ppm): **the tetrahydropyran ring**: 83.17(C2), 49.47(C3), 71.13(C4), 94.22(C6), **A ring**: 137.77(C1), 128.46(C2,C6), 131.51 (C3,C5), 122.36(C4); **B ring**: 144.34(C1), 129.24(C2,C6), 123.85(C3,C5), 147.22(C4). HRMS (ESI):  $\text{C}_{16}\text{H}_{14}\text{BrNO}_4\text{Na}^+$ , calcd  $m/z$  386.0004; found  $m/z$  386.0001.

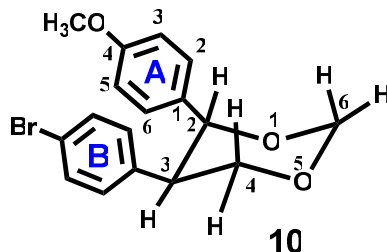

(**10**): Oil, yield: 87 mg (25%).  $^1\text{H}$  NMR (500 MHz,  $\text{CDCl}_3$ , 298 K):  $\delta$  (ppm): **the tetrahydropyran ring**: 5.26 (1H, AB spin system,  $^2J = -6$  Hz, H6), 4.95 (1H, AB spin system, H6'), 4.59 (1H, d,  $^3J = 10.5$  Hz, H2), 3.16 (1H, ddd,  $^3J = 11$  Hz,  $^3J = 4.5$  Hz, H3), 4.17 (1H, AB spin system, dd,  $^2J = -11$  Hz,  $^3J = 4.5$  Hz, H4), 3.86 (1H, AB spin system, t,  $^2J = -11$  Hz, H4'); **A ring**: 7.04 (2H, d,  $^3J = 8.5$  Hz, H2,H6), 6.72 (2H, d, H3,H5), 3.72 (3H, s,  $\text{OCH}_3$ ), **B ring**: 6.87 (2H, d,  $^3J = 8.5$  Hz, H2, H6), 7.30 (2H, d, H3, H5);  $^{13}\text{C}$  NMR (125 MHz,  $\text{CDCl}_3$ , 298 K):  $\delta$  (ppm): **the tetrahydropyran ring**: 83.61(C2), 48.63(C3), 71.73(C4), 94.22(C6), **A ring**: 130.51(C1), 128.22(C2,C6), 113.57 (C3,C5), 159.27(C4), 55.13(s, (C4-  $\text{OCH}_3$ )); **B ring**: 136.37(C1), 129.98(C2,C6), 131.61(C3,C5), 120.99(C4). HRMS (ESI):  $\text{C}_{17}\text{H}_{17}\text{BrO}_3\text{Na}^+$ , calcd  $m/z$  371.0259; found  $m/z$  371.0262.

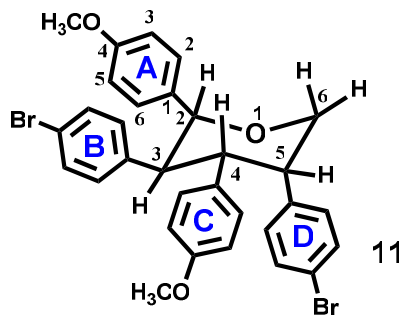

(**11**): 3,5-bis(4-bromophenyl)-2,4-bis(4-methoxyphenyl)tetrahydro-2H-pyran. White solid, yield: 364 mg (60%), m.p. 119-121  $^\circ\text{C}$  (EtOH).  $^1\text{H}$  NMR (500 MHz,  $\text{CDCl}_3$ , 298 K):  $\delta$  (ppm): **the tetrahydropyran ring**: 4.36 (1H, AB spin system, dd,  $^2J = -12$  Hz,  $^3J = 3.5$  Hz, H6), 4.58 (1H, AB spin system, H6'), 4.48 (1H, d,  $^3J = 9.5$  Hz, H2), 3.26 (1H, d,  $^3J = 10$  Hz, H3), 3.78 (1H, d,  $^3J = 4$  Hz, H4), 3.05 (1H, dd, H5); **A ring**: 7.02 (2H, d,  $^3J = 9$  Hz, H2,H6), 6.74 (2H, d, H3,H5), 3.76 (3H, s,  $\text{OCH}_3$ ); **B ring**: 6.66 (2H, d,  $^3J = 8.5$  Hz, H2, H6), 7.05 (2H, d, H3, H5), **C ring**: 6.52 (2H, s, H2, H6), 6.52 (2H, s, H3, H5); 3.67 (3H, s,  $\text{OCH}_3$ ); **D ring**: 7.12 (2H, d,  $^3J = 8.5$  Hz, H2,H6), 7.32 (2H, d, H3,H5).  $^{13}\text{C}$  NMR (125 MHz,  $\text{CDCl}_3$ , 298 K):  $\delta$  (ppm): **the tetrahydropyran ring**: 86.36(C2), 48.11(C3), 50.49(C4), 46.34(C5), 72.63(C6), **A ring**: 132.44(C1),

128.18(C2,C6), 113.50 (C3,C5), 159.01(C4), 55.18 (OCH<sub>3</sub>); **B ring**: 138.48(C1), 130.36(C2,C6), 130.92(C3,C5), 119.75(C4); **C ring**: 132.14(C1), 129.76(C2,C6), 113.09(C3,C5), 157.75(C4), 55.00 (OCH<sub>3</sub>), **D ring**: 139.74(C1), 132.08(C2,C6), 130.53(C3,C5), 120.50(C4). HRMS (ESI TOF MS ES<sup>-</sup>): C<sub>31</sub>H<sub>27</sub>Br<sub>2</sub>O<sub>3</sub>, calcd *m/z* 605.0327; found *m/z* 605.0318.

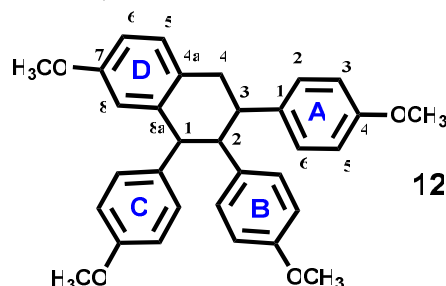

(**12**): 7-methoxy-1,2,3-tris(4-methoxyphenyl)-1,2,3,4-tetrahydronaphthalene. White solid, yield: 432 mg (90%), m.p. 139-140 °C (EtOH). <sup>1</sup>H NMR (500 MHz, CDCl<sub>3</sub>, 298 K): δ (ppm): **the ring**: 3.06 (1H, AB spin system, dd <sup>2</sup>*J* = -16.5 Hz, <sup>3</sup>*J* = 4.5 Hz, H4), 3.18 (1H, AB spin system, dd, <sup>3</sup>*J* = 11.5 Hz, H4'), 4.18 (1H, d, <sup>3</sup>*J* = 10.5 Hz, H1), 3.15 (1H, dd, <sup>3</sup>*J* = 11 Hz, H2), 3.33 (1H, ddd, H3); **A ring**: 6.75 (2H, d, <sup>3</sup>*J* = 8.5 Hz, H2,H6), 6.66 (2H, d, H3,H5), 3.74 (3H, s, OCH<sub>3</sub>); **B ring** 6.68 (2H, d, <sup>3</sup>*J* = 8.5 Hz, H2, H6), 6.52 (2H, d, H3, H5), 3.65 (3H, s, OCH<sub>3</sub>); **C ring**: 6.98 (2H, d, <sup>3</sup>*J* = 8.5 Hz, H2, H6), 6.64 (2H, d, H3, H5), 3.70 (3H, s, OCH<sub>3</sub>); **D ring** 7.07(1H, d, <sup>3</sup>*J* = 8.5 Hz, H5), 6.34 (1H, d, <sup>4</sup>*J* = 2.5 Hz, H8), 6.72 (1H, dd, H6), 3.63 (3H, s, OCH<sub>3</sub>). <sup>13</sup>C NMR (125 MHz, CDCl<sub>3</sub>, 298 K): δ (ppm): **the ring**: 55.02(C1), 55.53(C2), 46.35(C3), 39.65(C4); **A ring**: 137.58(C1), 130.19(C2,C6), 113.45(C3,C5), 157.64 (C4), 55.09(OCH<sub>3</sub>); **B ring**: 135.18(C1), 129.26(C2,C6), 113.03 (C3,C5), 157.18(C4) 54.91 (OCH<sub>3</sub>); **C ring**: 136.82(C1), 128.52 (C2,C6), 113.33 (C3,C5), 157.45(C4), 55.06 (OCH<sub>3</sub>); **D ring** 129.37 (C4a), 129.06 (C5), 112.07 (C6), 157.75 (C7), 114.86 (C8), 141.45 (C8a), 55.20(OCH<sub>3</sub>). HRMS (ESI): C<sub>32</sub>H<sub>32</sub>O<sub>4</sub>Na<sup>+</sup>, calcd *m/z* 503.2198; found *m/z* 503.2195.

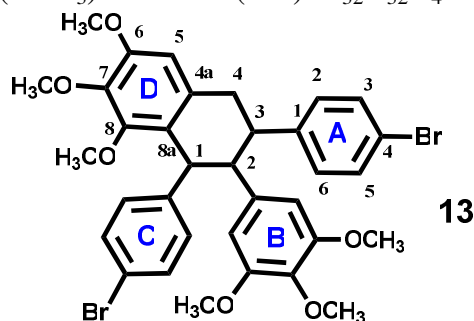

(**13**): 1,3-bis(4-bromophenyl)-6,7,8-trimethoxy-2-(3,4,5-trimethoxyphenyl)-1,2,3,4-tetrahydronaphthalene. Oil, yield: 594 mg (85%). <sup>1</sup>H NMR (500 MHz, CDCl<sub>3</sub>, 298 K): δ (ppm): **the ring**: 2.92 (1H, dd(AB spin system), <sup>2</sup>*J* = -17.5 Hz, <sup>3</sup>*J* = 10 Hz, H4), 3.29 (1H, AB spin system, H4'), 4.28 (1H, d, <sup>3</sup>*J* = 11 Hz, H1), 3.52 (1H, dd, <sup>3</sup>*J* = 10.5 Hz H2), 3.33 (1H, dd, H3); **A ring**: 7.39 (2H, d, <sup>3</sup>*J* = 8.5 Hz, H2, H6), 7.56 (2H, d, H3,

H5); **B ring** 6.44 (2H, s, H2, H6), 3.60 (1H, s, (C3 or C5-OCH<sub>3</sub>), 3.82 (1H, s, C3 or C5-OCH<sub>3</sub>), 3.81 (1H, s, (C4) OCH<sub>3</sub>); **C ring**: 7.35 (2H, d, <sup>3</sup>J = 8.5 Hz, H2, H6), 7.51 (2H, d, H3, H5); **D ring** 5.53 (1H, s, H5), 3.43 (3H, s, C6, OCH<sub>3</sub>), 3.19 (3H, s, C8, OCH<sub>3</sub>), 3.69 (3H, s, C7, OCH<sub>3</sub>). <sup>13</sup>C NMR (125 MHz, CDCl<sub>3</sub>, 298 K): δ (ppm): **the ring**: 57.58(C2), 51.51(C3), 45.69(C1), 34.62(C4); **A ring**: 144.35(C1), 130.07(C2, C6), 131.84(C3, C5), 120.51(C4); **B ring**: 122.09(C1), 104.64(C2, C6), 151.34, 151.41 (C3, C5), 140.46(C4), 60.28(C3 or C5-OCH<sub>3</sub>), 55.72(C5 or C3-OCH<sub>3</sub>), 60.79 (C4-OCH<sub>3</sub>); **C ring**: 144.30(C1), 129.94(C2, C6), 131.58(C3, C5), 120.06(C4); **D ring**: 131.35(C4a), 103.18(C5), 152.90(C6), 141.36(C7), 150.42 (C8), 141.36(C8a), 55.40(C6-OCH<sub>3</sub>), 60.67 (C7-OCH<sub>3</sub>), 59.84(C8-OCH<sub>3</sub>). HRMS (ESI TOF MS ES<sup>-</sup>, 1.91e<sup>4</sup>): C<sub>34</sub>H<sub>34</sub>Br<sub>2</sub>O<sub>6</sub> Na<sup>+</sup>, calcd *m/z* 721.0600; found *m/z* 721.0598.

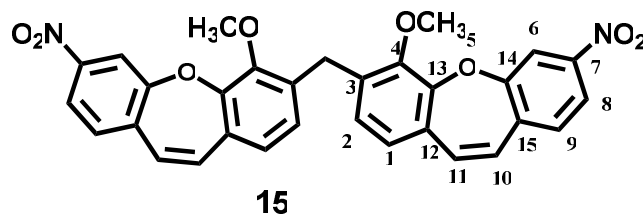

**(15):** bis(4-methoxy-7-nitrodibenzo[*b,f*]oxepin-3-yl)methane. White solid, above of temperature 123°C decomposition of molecule, yield: 275 mg (100%). <sup>1</sup>H NMR (500 MHz, CDCl<sub>3</sub>, 298 K): δ (ppm): 3.94 (6H, s, OCH<sub>3</sub>, OCH<sub>3</sub>'), 3.96 (2H, s, CH<sub>2</sub>), 6.67 (2H, d, <sup>3</sup>J = 8.5 Hz H2, H2'), 6.83 (2H, d(AB spin system), <sup>3</sup>J = 11.5 Hz, H10, H10'), 6.89 (2H, d, H1, H1'), 6.98 (2H, d(AB spin system), H11, H11'), 7.32 (2H, d, <sup>3</sup>J = 8.5 Hz H9, H9'), 8.01 (2H, dd, <sup>3</sup>J = 8.5 Hz, <sup>4</sup>J = 2.5 Hz, H8, H8'), 8.19 (2H, d, H6, H6'). <sup>13</sup>C NMR (125 MHz, CDCl<sub>3</sub>, 298 K): δ (ppm): 35.37 (CH<sub>2</sub>), 56.17(2xOCH<sub>3</sub>), 112.97(C1, C1'), 117.49(C6, C6'), 120.07(C8, C8'), 126.56(C2, C2'), 128.65 (C10, C10'), 128.95 (C9, C9'), 129.29 (C12, C12'), 129.35 (C3, C3'), 130.50 (C11, C11'), 137.49(C15, C15'), 145.80 (C13, C13'), 148.54 (C7, C7'), 150.45 (C4, C4'), 157.35 (C14, C14'). HRMS (ESI): C<sub>31</sub>H<sub>22</sub>N<sub>2</sub>O<sub>8</sub>Na, calcd *m/z* 573.1274; found *m/z* 573.1277.

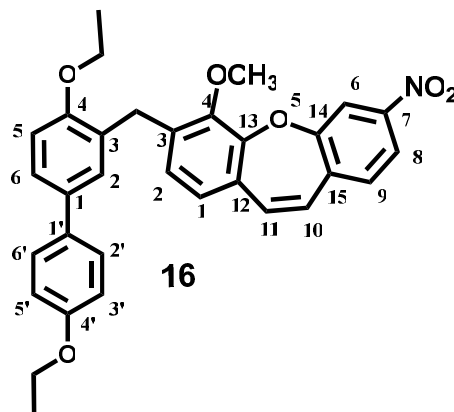

**(16):** 3-((4,4'-diethoxy-[1,1'-biphenyl]-3-yl)methyl)-4-methoxy-7-nitrodibenzo[*b,f*]oxepin. Yellow solid, above of temperature 115 °C decomposition of molecule, yield 314 mg (60%). <sup>1</sup>H NMR (500 MHz, CDCl<sub>3</sub>, 298 K): δ (ppm): 4.01 (2H, s, CH<sub>2</sub>), dibenzo[*b,f*]oxepin ring: 8.20 (1H, d, <sup>4</sup>*J* = 2.5 Hz, H6), 7.99 (1H, dd, <sup>3</sup>*J* = 8.5 Hz, H8), 7.29 (1H, d, H9), 7.15 (1H, d(AB spin system), <sup>3</sup>*J* = 11.5 Hz, H11), 6.97 (1H, d(AB spin system), <sup>3</sup>*J* = 8.5 Hz, H2), 6.93 (1H, d(AB spin system), H1), 6.81(1H, d(AB spin system), H10), 3.95 (3H, s, OCH<sub>3</sub>); biphenyl ring: 7.33 (1H, dd, <sup>3</sup>*J* = 8.5 Hz, <sup>4</sup>*J* = 2.5 Hz, H6), 7.25 (2H, d, H2', H6'), 6.96 (1H, d, H2) 6.90 (1H, d, <sup>3</sup>*J* = 8.5 Hz, H5), 6.83 (2H, d, <sup>3</sup>*J* = 8.5 Hz, H3', H5'), 4.09 (2H, q, <sup>3</sup>*J* = 7 Hz, OCH<sub>2</sub>), 4.01(2H, q, <sup>3</sup>*J* = 7 Hz, OCH<sub>2</sub>), 1.43 (3H, t, CH<sub>3</sub>); 1.41 (3H, t, CH<sub>3</sub>). <sup>13</sup>C NMR (125 MHz, CDCl<sub>3</sub>, 298 K): δ (ppm): 32.64 (CH<sub>2</sub>), dibenzo[*b,f*]oxepin ring: 157.95(C14), 150.16(C4), 148.36(C7), 145.77(C13), 137.81(C15), 131.72(C11), 129.62(C12), 128.81(C3), 128.06(C9), 127.87(C10), 127.35(C2), 119.89(C8), 117.46(C6), 113.00(C1), 56.15(OCH<sub>3</sub>); biphenyl ring: 157.37(C4'), 155.50(C4), 133.28(C1), 133.05(C1'), 130.55(C3), 127.56(C2) and (C2', C6'), 125.42(C6), 114.60(C3', C5'), 111.27(C5) 63.72(OCH<sub>2</sub>), 63.47(OCH<sub>2</sub>), 14.96 (CH<sub>3</sub>), 14.83(CH<sub>3</sub>). HRMS (ESI): C<sub>32</sub>H<sub>29</sub>NO<sub>6</sub>Na, calcd *m/z* 546.1893; found *m/z* 546.1873.

**Procedure of synthesis of compound (12) with iodine:** (*E*)-stilben (**5**) (1 mmol), and iodine (1mmol) in dichloromethane (15 ml), [and or not paraformaldehyde (1 mmol)] were sequentially added to a three-necked flask (25 mL). The mixture was stirred at room temperature for 20 h under nitrogen atmosphere. The solution was poured into methanol (15ml) and washed with water with Na<sub>2</sub>S<sub>2</sub>O<sub>5</sub> and water. The organic layer was dried over anhydrous MgSO<sub>4</sub> and concentrated in vacuo. The residue was purified by flash column chromatography on silica gel (eluent: CH<sub>2</sub>Cl<sub>2</sub>). Yield 90% ( or with paraformaldehyde 70%).

### Computational aspects

The optimum ground-state geometry for (**11-13, 15, 16**) compounds were calculated using the density functional theory (DFT). In calculation the B3LYP functional and /6-31G\* basis set was employed and the continuum model (PCM; Gaussian 03W) [1,2] was used in order to simulate the effects of the solvent. All the calculations were performed on a server equipped with a 16 quad-core XEON (R) CPU E7310 processor operating at 1.60 GHz. The operating system was Open SUSE 10.3. in CDCl<sub>3</sub> as a solvent. Proton and carbon chemical shifts were calculated using GIAO–DFT method. In calculation stages the B3LYP functional and 6-31g\* basis set were employed and the Gaussian 03W program was used. The relative chemical shift of a given nucleus *X* in the molecule was defined as  $\delta \text{ calc } X \text{ [ppm]} = \sigma_{\text{ref}X} - \sigma_{\text{calc}X}$ . For the <sup>1</sup>H and <sup>13</sup>C spectra,  $\sigma_{\text{ref}X}$  is equal to 31.9 and 183.06 ppm respectively, as found on the DFT [B3LYP/6-31g\*] geometry of the dual reference standard (TMS).

The calculated coordinates of (11) ( the part of calculated log file):

After PCM corrections, the SCF energy is -6567.22609663 a.u.

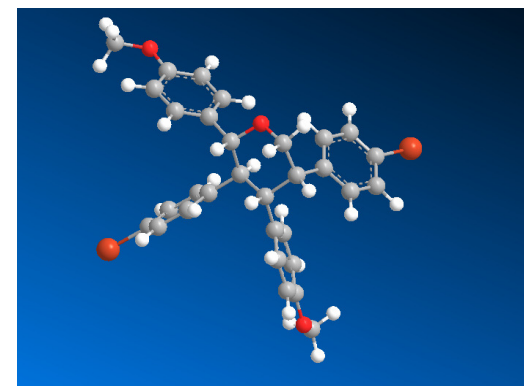

## Standard orientation:

| Center<br>Number | Atomic<br>Number | Atomic<br>Type | Coordinates (Angstroms) |           |           |
|------------------|------------------|----------------|-------------------------|-----------|-----------|
|                  |                  |                | X                       | Y         | Z         |
| 1                | 6                | 0              | 4.014114                | -3.486809 | 0.420957  |
| 2                | 6                | 0              | 3.180448                | -2.656265 | 1.176172  |
| 3                | 6                | 0              | 1.825733                | -2.509931 | 0.878463  |
| 4                | 6                | 0              | 1.306710                | -3.235425 | -0.206629 |
| 5                | 6                | 0              | 2.116797                | -4.068531 | -0.965507 |
| 6                | 6                | 0              | 3.480918                | -4.197995 | -0.658775 |
| 7                | 6                | 0              | 0.944023                | -1.592850 | 1.697262  |
| 8                | 6                | 0              | 0.466380                | -0.326031 | 0.920335  |
| 9                | 6                | 0              | 1.655958                | 0.492014  | 0.441231  |
| 10               | 6                | 0              | 1.990193                | 0.531074  | -0.918231 |
| 11               | 6                | 0              | 3.091977                | 1.250916  | -1.380633 |
| 12               | 6                | 0              | 3.877865                | 1.941870  | -0.463172 |
| 13               | 6                | 0              | 3.579767                | 1.922564  | 0.896897  |
| 14               | 6                | 0              | 2.472088                | 1.198236  | 1.337207  |
| 15               | 6                | 0              | -0.513687               | 0.491302  | 1.805511  |
| 16               | 6                | 0              | -1.679118               | -0.414914 | 2.344022  |
| 17               | 6                | 0              | -1.043835               | -1.643275 | 3.013527  |
| 18               | 8                | 0              | -0.177065               | -2.362755 | 2.143200  |
| 19               | 6                | 0              | -2.768567               | -0.755247 | 1.334610  |
| 20               | 6                | 0              | -1.002802               | 1.790035  | 1.184315  |
| 21               | 6                | 0              | -3.872134               | 0.102851  | 1.203648  |
| 22               | 6                | 0              | -4.906968               | -0.162722 | 0.308058  |
| 23               | 6                | 0              | -4.842651               | -1.313333 | -0.473720 |
| 24               | 6                | 0              | -3.771083               | -2.194040 | -0.365364 |
| 25               | 6                | 0              | -2.742800               | -1.909714 | 0.536386  |
| 26               | 6                | 0              | -1.126692               | 2.935467  | 1.988080  |
| 27               | 6                | 0              | -1.599630               | 4.138740  | 1.479258  |
| 28               | 6                | 0              | -1.961496               | 4.234555  | 0.128162  |
| 29               | 6                | 0              | -1.843649               | 3.108449  | -0.693641 |
| 30               | 6                | 0              | -1.371918               | 1.906279  | -0.159181 |
| 31               | 35               | 0              | -6.256808               | -1.692373 | -1.712475 |

|    |    |   |           |           |           |
|----|----|---|-----------|-----------|-----------|
| 32 | 35 | 0 | 5.393996  | 2.939888  | -1.080897 |
| 33 | 8  | 0 | 4.192500  | -5.038689 | -1.465664 |
| 34 | 6  | 0 | 5.580758  | -5.200911 | -1.207196 |
| 35 | 8  | 0 | -2.407519 | 5.458612  | -0.284218 |
| 36 | 6  | 0 | -2.774464 | 5.613671  | -1.648054 |
| 37 | 1  | 0 | 5.062034  | -3.570299 | 0.685293  |
| 38 | 1  | 0 | 3.607297  | -2.108815 | 2.013213  |
| 39 | 1  | 0 | 0.252538  | -3.153456 | -0.456118 |
| 40 | 1  | 0 | 1.716815  | -4.632563 | -1.802998 |
| 41 | 1  | 0 | 1.509392  | -1.251348 | 2.581428  |
| 42 | 1  | 0 | -0.073626 | -0.689035 | 0.037667  |
| 43 | 1  | 0 | 1.383101  | -0.015497 | -1.635239 |
| 44 | 1  | 0 | 3.334046  | 1.271256  | -2.437984 |
| 45 | 1  | 0 | 4.199789  | 2.465533  | 1.602617  |
| 46 | 1  | 0 | 2.249422  | 1.193942  | 2.400975  |
| 47 | 1  | 0 | 0.044281  | 0.772390  | 2.710818  |
| 48 | 1  | 0 | -2.160813 | 0.161806  | 3.145590  |
| 49 | 1  | 0 | -0.481264 | -1.316131 | 3.904332  |
| 50 | 1  | 0 | -1.806781 | -2.358423 | 3.334978  |
| 51 | 1  | 0 | -3.926275 | 1.000779  | 1.813096  |
| 52 | 1  | 0 | -5.750557 | 0.514154  | 0.222637  |
| 53 | 1  | 0 | -3.736081 | -3.093625 | -0.971242 |
| 54 | 1  | 0 | -1.918253 | -2.607608 | 0.630700  |
| 55 | 1  | 0 | -0.842746 | 2.884059  | 3.037631  |
| 56 | 1  | 0 | -1.688067 | 5.020058  | 2.107749  |
| 57 | 1  | 0 | -2.115144 | 3.150135  | -1.742414 |
| 58 | 1  | 0 | -1.298878 | 1.047375  | -0.819421 |
| 59 | 1  | 0 | 5.947276  | -5.895010 | -1.965625 |
| 60 | 1  | 0 | 6.120254  | -4.249021 | -1.294771 |
| 61 | 1  | 0 | 5.757866  | -5.625691 | -0.210623 |
| 62 | 1  | 0 | -3.089254 | 6.653155  | -1.757201 |
| 63 | 1  | 0 | -1.927036 | 5.418938  | -2.318061 |
| 64 | 1  | 0 | -3.607657 | 4.952392  | -1.919524 |

-----

The calculated proton and  $^{13}\text{C}$  chemical shifts and coupling constants for (**11**):



(11):  $^1\text{H}$  NMR  $\delta$  (ppm): **the tetrahydropyran ring**: 4.44 (1H, AB spin system, dd,  $^2J = -11.7$  Hz,  $^3J = 3,4$  Hz, H6), 4.61 (1H, AB spin system,  $^3J = 1.1$  Hz, H6'), 4.52 (1H, d,  $^3J = 8.1$  Hz, H2), 3.27 (1H, d,  $^3J = 10.6$  Hz, H3), 3.79 (1H, d,  $^3J = 5.1$  Hz, H4), 3.01 (1H, dd, H5); **A ring**: 7.39 (2H, d,  $^3J = 7.1$  Hz, H2,H6), 6.86 (2H, d, H3,H5), 3.69 (3H, s, OCH<sub>3</sub>); **B ring** 7.02 (2H, d,  $^3J = 7.2$  Hz, H2, H6), 7.15 (2H, d, H3, H5), **C ring**: 6.83 (2H, s, H2, H6), 6.66 (2H, s, H3, H5); 3.58 (3H, s, OCH<sub>3</sub>); **D ring** 7.60 (2H, d,  $^3J = 7.3$  Hz, H2,H6), 7.47 (2H,d, H3,H5).

$^{13}\text{C}$  NMR (125 MHz, CDCl<sub>3</sub>, 298 K):  $\delta$  (ppm): **the tetrahydropyran ring**: 94.18 (C2), 55.30 (C3), 58.24 (C4), 53.25 (C5), 78.00 (C6), **A ring**: 139.65 (C1), 134.45 (C2,C6), 116.83 (C3,C5), 166.95 (C4), 55.94 (OCH<sub>3</sub>); **B ring** 148.27 (C1), 136.26 (C2,C6), 136.22 (C3,C5), 143.19 (C4) - different chemical shift compared to the experimental chemical shift; **C ring**: 139.43 (C1), 136.45 (C2,C6), 116.41 (C3,C5), 165.72 (C4), 55.76 (OCH<sub>3</sub>), **D ring**: 149.28 (C1), 138.34 (C2,C6), 135.76 (C3,C5), 144.21(C4) -different chemical shift compared to the experimental chemical shift.

The calculated coordinates of (12) ( the part of calculated log file):

After PCM corrections, the SCF energy is -1539.54534387 a.u.

Standard orientation:

| Center Number | Atomic Number | Atomic Type | Coordinates (Angstroms) |           |           |
|---------------|---------------|-------------|-------------------------|-----------|-----------|
|               |               |             | X                       | Y         | Z         |
| 1             | 6             | 0           | -1.022958               | -1.662770 | -0.233083 |
| 2             | 6             | 0           | -0.219428               | -0.356852 | 0.029452  |
| 3             | 6             | 0           | -2.472580               | -1.592433 | 0.221120  |
| 4             | 6             | 0           | -0.924237               | 0.890833  | -0.482207 |
| 5             | 6             | 0           | -3.517873               | -1.798896 | -0.681583 |
| 6             | 6             | 0           | -4.859315               | -1.774525 | -0.285514 |
| 7             | 6             | 0           | -5.176937               | -1.536799 | 1.054814  |
| 8             | 6             | 0           | -4.142525               | -1.326254 | 1.978698  |
| 9             | 6             | 0           | -2.817469               | -1.356208 | 1.563457  |
| 10            | 6             | 0           | -1.266898               | 1.038897  | -1.837480 |
| 11            | 6             | 0           | -1.901115               | 2.182456  | -2.305956 |
| 12            | 6             | 0           | -2.216126               | 3.225986  | -1.423251 |
| 13            | 6             | 0           | -1.886144               | 3.101441  | -0.070874 |
| 14            | 6             | 0           | -1.247265               | 1.941203  | 0.378486  |
| 15            | 6             | 0           | 1.227475                | -0.454571 | -0.560509 |
| 16            | 6             | 0           | 1.877103                | -1.833753 | -0.404011 |

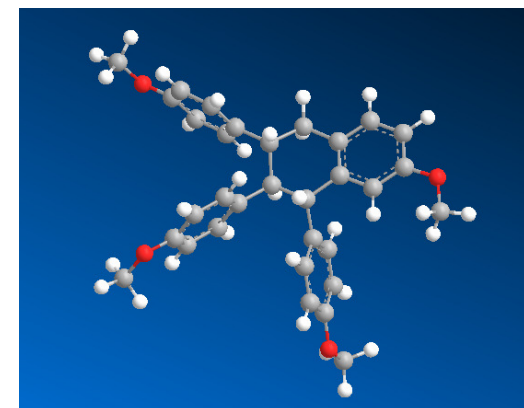

|    |   |   |           |           |           |
|----|---|---|-----------|-----------|-----------|
| 17 | 6 | 0 | 1.158163  | -2.951038 | 0.037185  |
| 18 | 6 | 0 | -0.296621 | -2.845663 | 0.435544  |
| 19 | 6 | 0 | 3.226373  | -1.978340 | -0.777376 |
| 20 | 6 | 0 | 3.862127  | -3.216866 | -0.704108 |
| 21 | 6 | 0 | 3.145803  | -4.336808 | -0.254786 |
| 22 | 6 | 0 | 1.814545  | -4.192602 | 0.102569  |
| 23 | 6 | 0 | 2.104600  | 0.668252  | -0.013021 |
| 24 | 6 | 0 | 2.431020  | 1.783379  | -0.798308 |
| 25 | 6 | 0 | 3.208822  | 2.822424  | -0.297824 |
| 26 | 6 | 0 | 3.684725  | 2.773592  | 1.018780  |
| 27 | 6 | 0 | 3.370907  | 1.669821  | 1.821661  |
| 28 | 6 | 0 | 2.590610  | 0.636342  | 1.298567  |
| 29 | 8 | 0 | -6.447015 | -1.490191 | 1.560995  |
| 30 | 6 | 0 | -7.530565 | -1.675326 | 0.661600  |
| 31 | 8 | 0 | -2.837773 | 4.310396  | -1.980159 |
| 32 | 6 | 0 | -3.174342 | 5.396159  | -1.128921 |
| 33 | 8 | 0 | 5.168672  | -3.442798 | -1.043962 |
| 34 | 6 | 0 | 5.942487  | -2.341033 | -1.496193 |
| 35 | 8 | 0 | 4.440936  | 3.839929  | 1.421766  |
| 36 | 6 | 0 | 4.948639  | 3.836895  | 2.748306  |
| 37 | 1 | 0 | -1.023098 | -1.844226 | -1.317340 |
| 38 | 1 | 0 | -0.118455 | -0.254744 | 1.118583  |
| 39 | 1 | 0 | -3.288359 | -1.984579 | -1.728582 |
| 40 | 1 | 0 | -5.634729 | -1.940064 | -1.025053 |
| 41 | 1 | 0 | -4.401881 | -1.141509 | 3.017165  |
| 42 | 1 | 0 | -2.037947 | -1.193300 | 2.303898  |
| 43 | 1 | 0 | -1.037788 | 0.245543  | -2.545553 |
| 44 | 1 | 0 | -2.165293 | 2.289449  | -3.354090 |
| 45 | 1 | 0 | -2.115580 | 3.889711  | 0.637370  |
| 46 | 1 | 0 | -0.992592 | 1.862382  | 1.432681  |
| 47 | 1 | 0 | 1.132464  | -0.281765 | -1.642264 |
| 48 | 1 | 0 | -0.380684 | -2.739101 | 1.527951  |
| 49 | 1 | 0 | -0.818461 | -3.778902 | 0.189033  |
| 50 | 1 | 0 | 3.766569  | -1.101678 | -1.115344 |
| 51 | 1 | 0 | 3.647723  | -5.298440 | -0.203548 |
| 52 | 1 | 0 | 1.258907  | -5.064326 | 0.442652  |

|    |   |   |           |           |           |
|----|---|---|-----------|-----------|-----------|
| 53 | 1 | 0 | 2.063082  | 1.843548  | -1.819664 |
| 54 | 1 | 0 | 3.459309  | 3.682586  | -0.911789 |
| 55 | 1 | 0 | 3.728559  | 1.600414  | 2.842942  |
| 56 | 1 | 0 | 2.370085  | -0.220820 | 1.930569  |
| 57 | 1 | 0 | -8.437759 | -1.588170 | 1.262432  |
| 58 | 1 | 0 | -7.539906 | -0.907060 | -0.122847 |
| 59 | 1 | 0 | -7.500933 | -2.667209 | 0.191656  |
| 60 | 1 | 0 | -3.651399 | 6.142165  | -1.767505 |
| 61 | 1 | 0 | -3.876773 | 5.090391  | -0.342365 |
| 62 | 1 | 0 | -2.282597 | 5.835424  | -0.662683 |
| 63 | 1 | 0 | 6.939101  | -2.737575 | -1.699730 |
| 64 | 1 | 0 | 5.530023  | -1.907994 | -2.417016 |
| 65 | 1 | 0 | 6.013090  | -1.556366 | -0.731705 |
| 66 | 1 | 0 | 5.515260  | 4.763875  | 2.855085  |
| 67 | 1 | 0 | 4.139925  | 3.819403  | 3.490724  |
| 68 | 1 | 0 | 5.615588  | 2.982595  | 2.923821  |

-----  
The calculated proton and  $^{13}\text{C}$  chemical shifts and coupling constants for (**12**):

(**12**):  $^1\text{H}$  NMR,  $\delta$  (ppm): **the ring**: 3.00 (1H, AB spin system,  $^2J = -15.9$  Hz,  $^3J = 4.0$  Hz, H4'), 3.32 (1H, AB spin system,  $^3J = 10.5$  Hz, H4'), 4.33 (1H, d,  $^3J = 9$  Hz, H1), 3.15 (1H, dd,  $^3J = 10$  Hz, H2), 3.32 (1H, ddd, H3); **A ring**: 7.09 (2H, d,  $^3J = 6.9$  Hz, H2,H6), 6.81 (2H, d, H3,H5), 3.74 (3H, s, OCH<sub>3</sub>); **B ring**: 7.05 (2H, d,  $^3J = 7.0$  Hz, H2, H6), 6.64 (2H, d, H3, H5), 3.56 (3H, s, OCH<sub>3</sub>); **C ring**: 7.30 (2H, d,  $^3J = 6.9$  Hz, H2, H6), 6.77 (2H, d, H3, H5), 3.64 (3H, s, OCH<sub>3</sub>); **D ring**: 7.29 (1H, d,  $^3J = 6.7$  Hz, H5), 6.31 (1H, d,  $^4J = 2.5$  Hz, H8), 6.89 (1H, dd, H6), 3.46 (3H, s, OCH<sub>3</sub>).  $^{13}\text{C}$  NMR (125 MHz, CDCl<sub>3</sub>, 298 K):  $\delta$  (ppm): **the ring**: 62.60 (C1), 63.81 (C2), 53.22 (C3), 45.01 (C4); **A ring**: 146.71 (C1), 136.71 (C2,C6), 116.50 (C3,C5), 165.52 (C4), 55.88 (OCH<sub>3</sub>); **B ring**: 143.04 (C1), 135.55 (C2,C6), 116.27 (C3,C5), 165.27 (C4) 55.60 (OCH<sub>3</sub>); **C ring**: 144.49 (C1), 134.44 (C2,C6), 116.62 (C3,C5), 165.39 (C4), 55.69 (OCH<sub>3</sub>); **D ring**: 136.24 (C4a), 134.38 (C5), 119.42 (C6), 165.11 (C7), 115.01 (C8), 150.55 (C8a), 55.44 (OCH<sub>3</sub>).

The calculated coordinates of (**13**)( the part of calculated log file):

After PCM corrections, the SCF energy is -6910.77271155 a.u.

Standard orientation:

-----  
Center            Atomic            Atomic            Coordinates (Angstroms)

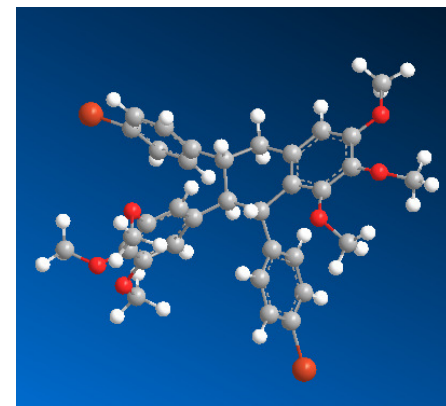

| Number | Number | Type | X         | Y         | Z         |
|--------|--------|------|-----------|-----------|-----------|
| 1      | 6      | 0    | -0.791635 | 1.810113  | 0.161502  |
| 2      | 6      | 0    | -0.183129 | 0.386706  | 0.023396  |
| 3      | 6      | 0    | -2.235489 | 1.888157  | -0.309724 |
| 4      | 6      | 0    | -1.048103 | -0.691264 | 0.664257  |
| 5      | 6      | 0    | -3.254329 | 2.249417  | 0.580387  |
| 6      | 6      | 0    | -4.584722 | 2.347317  | 0.169491  |
| 7      | 6      | 0    | -4.900628 | 2.078204  | -1.158787 |
| 8      | 6      | 0    | -3.914014 | 1.715501  | -2.073056 |
| 9      | 6      | 0    | -2.591240 | 1.623933  | -1.640917 |
| 10     | 6      | 0    | -1.318855 | -0.674919 | 2.035613  |
| 11     | 6      | 0    | -2.126174 | -1.658473 | 2.613146  |
| 12     | 6      | 0    | -2.665688 | -2.686070 | 1.828948  |
| 13     | 6      | 0    | -2.387566 | -2.712838 | 0.448049  |
| 14     | 6      | 0    | -1.584144 | -1.719301 | -0.121981 |
| 15     | 6      | 0    | 1.288629  | 0.315666  | 0.567789  |
| 16     | 6      | 0    | 2.063287  | 1.627904  | 0.466570  |
| 17     | 6      | 0    | 1.526947  | 2.787417  | -0.097638 |
| 18     | 6      | 0    | 0.102043  | 2.804675  | -0.603494 |
| 19     | 6      | 0    | 3.372959  | 1.679335  | 1.001586  |
| 20     | 6      | 0    | 4.144204  | 2.847076  | 0.930896  |
| 21     | 6      | 0    | 3.587994  | 4.001665  | 0.334553  |
| 22     | 6      | 0    | 2.290911  | 3.962171  | -0.168985 |
| 23     | 6      | 0    | 2.010241  | -0.844077 | -0.120642 |
| 24     | 6      | 0    | 2.102386  | -2.098379 | 0.494496  |
| 25     | 6      | 0    | 2.713612  | -3.178916 | -0.143813 |
| 26     | 6      | 0    | 3.238938  | -2.999631 | -1.420763 |
| 27     | 6      | 0    | 3.161970  | -1.766223 | -2.063269 |
| 28     | 6      | 0    | 2.546779  | -0.699351 | -1.407269 |
| 29     | 35     | 0    | -6.722644 | 2.207212  | -1.741989 |
| 30     | 35     | 0    | 4.087846  | -4.472868 | -2.309293 |
| 31     | 8      | 0    | 4.381932  | 5.113201  | 0.343339  |
| 32     | 6      | 0    | 3.862300  | 6.313091  | -0.215499 |
| 33     | 8      | 0    | 3.796600  | 0.557678  | 1.662138  |
| 34     | 6      | 0    | 5.099028  | 0.028977  | 1.398575  |

|    |   |   |           |           |           |
|----|---|---|-----------|-----------|-----------|
| 35 | 8 | 0 | -2.425561 | -1.560110 | 3.953105  |
| 36 | 6 | 0 | -1.869330 | -2.585496 | 4.783930  |
| 37 | 8 | 0 | 5.374565  | 2.885123  | 1.547741  |
| 38 | 6 | 0 | 6.507170  | 3.097299  | 0.694792  |
| 39 | 8 | 0 | -3.432290 | -3.673547 | 2.406250  |
| 40 | 6 | 0 | -4.843437 | -3.458784 | 2.291222  |
| 41 | 8 | 0 | -2.956473 | -3.742790 | -0.243011 |
| 42 | 6 | 0 | -2.740538 | -3.807697 | -1.646393 |
| 43 | 1 | 0 | -0.770725 | 2.092542  | 1.222603  |
| 44 | 1 | 0 | -0.138590 | 0.174781  | -1.052721 |
| 45 | 1 | 0 | -3.008845 | 2.457246  | 1.618766  |
| 46 | 1 | 0 | -5.360992 | 2.627231  | 0.873929  |
| 47 | 1 | 0 | -4.172954 | 1.508625  | -3.106271 |
| 48 | 1 | 0 | -1.830233 | 1.339822  | -2.363295 |
| 49 | 1 | 0 | -0.926763 | 0.103222  | 2.684072  |
| 50 | 1 | 0 | -1.367902 | -1.736857 | -1.183774 |
| 51 | 1 | 0 | 1.230695  | 0.060169  | 1.631930  |
| 52 | 1 | 0 | 0.072194  | 2.564605  | -1.676957 |
| 53 | 1 | 0 | -0.309015 | 3.817071  | -0.511154 |
| 54 | 1 | 0 | 1.843186  | 4.850094  | -0.601222 |
| 55 | 1 | 0 | 1.692601  | -2.236820 | 1.491220  |
| 56 | 1 | 0 | 2.780132  | -4.144255 | 0.347212  |
| 57 | 1 | 0 | 3.576749  | -1.638593 | -3.057847 |
| 58 | 1 | 0 | 2.496611  | 0.265966  | -1.904749 |
| 59 | 1 | 0 | 4.652274  | 7.058150  | -0.106416 |
| 60 | 1 | 0 | 3.620984  | 6.190012  | -1.278990 |
| 61 | 1 | 0 | 2.967189  | 6.650171  | 0.322187  |
| 62 | 1 | 0 | 5.050917  | -1.028174 | 1.671013  |
| 63 | 1 | 0 | 5.345553  | 0.110383  | 0.333753  |
| 64 | 1 | 0 | 5.861775  | 0.534781  | 1.994477  |
| 65 | 1 | 0 | -2.178908 | -2.348718 | 5.804757  |
| 66 | 1 | 0 | -2.246046 | -3.572789 | 4.502125  |
| 67 | 1 | 0 | -0.772639 | -2.577363 | 4.727844  |
| 68 | 1 | 0 | 7.384694  | 3.040842  | 1.343238  |
| 69 | 1 | 0 | 6.572322  | 2.314103  | -0.071637 |
| 70 | 1 | 0 | 6.464823  | 4.077996  | 0.215101  |

|    |   |   |           |           |           |
|----|---|---|-----------|-----------|-----------|
| 71 | 1 | 0 | -5.323631 | -4.298178 | 2.800129  |
| 72 | 1 | 0 | -5.136059 | -2.520313 | 2.777621  |
| 73 | 1 | 0 | -5.152741 | -3.443928 | 1.240205  |
| 74 | 1 | 0 | -3.287128 | -4.687421 | -1.990831 |
| 75 | 1 | 0 | -3.128224 | -2.915911 | -2.155316 |
| 76 | 1 | 0 | -1.675813 | -3.926223 | -1.884395 |

The calculated proton and  $^{13}\text{C}$  chemical shifts and coupling constants for **(13)**:

**(13)**:  $^1\text{H}$  NMR,  $\delta$  (ppm): **the ring**: 2.38 (1H, dd(AB spin system),  $^2J = -17.6$  Hz,  $^3J = 10.6$  Hz, H4), 2.91 (1H, AB spin system,  $^3J = 3.4$  Hz, H4'), 4.02 (1H, d,  $^3J = 8.3$  Hz, H1), 2.42 (1H, dd,  $^3J = 10.5$  Hz H2), 2.77 (1H, dd, H3); **A ring**: 6.61 (2H, d,  $^3J = 8.2$  Hz, H2, H6), 6.63 (2H, d, H3, H5); **B ring** 5.61 (2H, s, H2, H6), 3.02 (3H, s, (C3 or C5-OCH<sub>3</sub>), 3.58 (3H, s, C3 or C5-OCH<sub>3</sub>), 3.21 (3H, s, (C4) OCH<sub>3</sub>); **C ring**: 6.46 (2H, d,  $^3J = 8.3$  Hz, H2,H6), 6.67 (2H, d, H3, H5); **D ring** 5.74 (1H, s, H5), 3.46 (3H, s, (C6, OCH<sub>3</sub>), 2.94 (3H, s, C8, OCH<sub>3</sub>), 3.45 (3H, s, C7, OCH<sub>3</sub>).  $^{13}\text{C}$  NMR,  $\delta$  (ppm): **the ring**: 54.01 (C2), 41.77 (C3), 46.94 (C1), 34.31(C4); **A ring**: 130.42 (C1), 116.47 (C2,C6) different chemical shift compared to the experimental chemical shift, 118.01 (C3,C5) different chemical shift compared to the experimental chemical shift, 125.36 (C4); **B ring**: 127.27 (C1), 100.15 (C2,C6), 140.95 (C3,C5), 128.90 (C4), 51.42 (C3 or C5-OCH<sub>3</sub>), 45.88 (C5 or C3-OCH<sub>3</sub>), 50.99 (C4-OCH<sub>3</sub>); **C ring**: 136.07 (C1), 116.58 (C2, C6) different chemical shift compared to the experimental chemical shift, 117.64 (C3,C5) different chemical shift compared to the experimental chemical shift, 124.29 (C4); **D ring**: 121.52 (C4a), 93.07(C5), 127.81 (C7), 139.89 (C6), 138.86 (C8), 113.92 (C8a), 45.88 (C6-OCH<sub>3</sub>), 50.49 (C7-OCH<sub>3</sub>), 50.27 (C8-OCH<sub>3</sub>).

The calculated coordinates of **(15)** ( the part of calculated log file):

After PCM corrections, the SCF energy is -1905.60044527 a.u.

Standard orientation:

| Center Number | Atomic Number | Atomic Type | Coordinates (Angstroms) |           |           |
|---------------|---------------|-------------|-------------------------|-----------|-----------|
|               |               |             | X                       | Y         | Z         |
| 1             | 6             | 0           | 5.401806                | -0.312384 | 0.111393  |
| 2             | 6             | 0           | 6.050984                | -0.789696 | -1.047481 |
| 3             | 6             | 0           | 5.875866                | -2.150950 | -1.545045 |
| 4             | 6             | 0           | 4.797299                | -2.947300 | -1.368941 |
| 5             | 6             | 0           | 3.571518                | -2.643415 | -0.633715 |

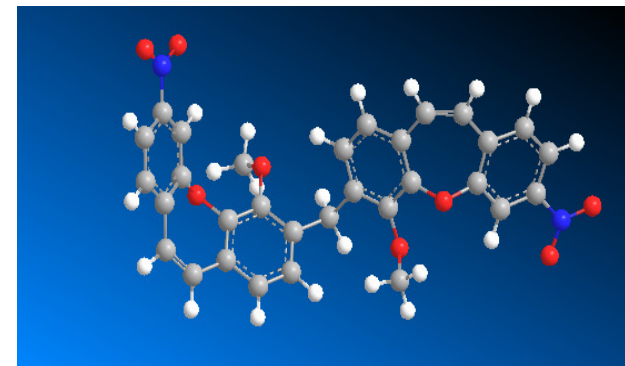

|    |   |   |           |           |           |
|----|---|---|-----------|-----------|-----------|
| 6  | 6 | 0 | 3.533980  | -1.727601 | 0.430329  |
| 7  | 8 | 0 | 4.708570  | -1.182801 | 0.936772  |
| 8  | 6 | 0 | 5.532700  | 1.002289  | 0.534164  |
| 9  | 6 | 0 | 6.358235  | 1.857108  | -0.195949 |
| 10 | 6 | 0 | 7.046184  | 1.425924  | -1.330303 |
| 11 | 6 | 0 | 6.885592  | 0.109198  | -1.741020 |
| 12 | 6 | 0 | 2.362248  | -3.262726 | -0.995365 |
| 13 | 6 | 0 | 1.172820  | -2.945869 | -0.350297 |
| 14 | 6 | 0 | 1.131165  | -2.011896 | 0.693693  |
| 15 | 6 | 0 | 2.339151  | -1.410818 | 1.089431  |
| 16 | 6 | 0 | -0.398393 | 0.819835  | 0.858443  |
| 17 | 6 | 0 | -0.909497 | -0.482081 | 0.748316  |
| 18 | 6 | 0 | -2.123221 | -0.665650 | 0.061422  |
| 19 | 6 | 0 | -2.803334 | 0.441991  | -0.466877 |
| 20 | 6 | 0 | -2.298563 | 1.745863  | -0.350356 |
| 21 | 6 | 0 | -1.066674 | 1.906147  | 0.309919  |
| 22 | 8 | 0 | -3.957599 | 0.195382  | -1.204239 |
| 23 | 6 | 0 | -5.144111 | 0.701404  | -0.699140 |
| 24 | 6 | 0 | -5.381805 | 2.092796  | -0.691597 |
| 25 | 6 | 0 | -4.346435 | 3.069598  | -1.014134 |
| 26 | 6 | 0 | -3.012107 | 2.916701  | -0.856292 |
| 27 | 6 | 0 | -6.122142 | -0.209120 | -0.326648 |
| 28 | 6 | 0 | -7.380952 | 0.274361  | 0.030317  |
| 29 | 6 | 0 | -7.675546 | 1.637914  | 0.023094  |
| 30 | 6 | 0 | -6.674188 | 2.529364  | -0.338330 |
| 31 | 6 | 0 | -0.180182 | -1.662132 | 1.377626  |
| 32 | 7 | 0 | 6.513306  | 3.241156  | 0.252279  |
| 33 | 8 | 0 | 5.903730  | 3.593761  | 1.264759  |
| 34 | 8 | 0 | 7.243851  | 3.984081  | -0.407841 |
| 35 | 8 | 0 | -2.671486 | -1.924025 | -0.039263 |
| 36 | 6 | 0 | -2.653515 | -2.507562 | -1.350283 |
| 37 | 8 | 0 | 2.341269  | -0.477030 | 2.101688  |
| 38 | 6 | 0 | 2.858609  | -0.937137 | 3.360286  |
| 39 | 7 | 0 | -8.422158 | -0.680794 | 0.408763  |
| 40 | 8 | 0 | -8.140588 | -1.881533 | 0.392376  |
| 41 | 8 | 0 | -9.527632 | -0.235335 | 0.726806  |

|    |   |   |           |           |           |
|----|---|---|-----------|-----------|-----------|
| 42 | 1 | 0 | 6.662104  | -2.508452 | -2.206500 |
| 43 | 1 | 0 | 4.790090  | -3.896118 | -1.902342 |
| 44 | 1 | 0 | 5.017430  | 1.343911  | 1.422087  |
| 45 | 1 | 0 | 7.686529  | 2.113689  | -1.867938 |
| 46 | 1 | 0 | 7.409167  | -0.240907 | -2.626201 |
| 47 | 1 | 0 | 2.364028  | -3.990021 | -1.802972 |
| 48 | 1 | 0 | 0.254702  | -3.443900 | -0.648907 |
| 49 | 1 | 0 | 0.541037  | 0.967997  | 1.381564  |
| 50 | 1 | 0 | -0.650686 | 2.905299  | 0.410332  |
| 51 | 1 | 0 | -4.709088 | 4.050441  | -1.314129 |
| 52 | 1 | 0 | -2.388601 | 3.789606  | -1.041451 |
| 53 | 1 | 0 | -5.911318 | -1.270323 | -0.333000 |
| 54 | 1 | 0 | -8.666218 | 1.978115  | 0.296853  |
| 55 | 1 | 0 | -6.884797 | 3.595143  | -0.342353 |
| 56 | 1 | 0 | -0.838273 | -2.533514 | 1.354349  |
| 57 | 1 | 0 | 0.014012  | -1.423256 | 2.428109  |
| 58 | 1 | 0 | -3.060927 | -3.514589 | -1.235991 |
| 59 | 1 | 0 | -3.271678 | -1.935291 | -2.047144 |
| 60 | 1 | 0 | -1.628328 | -2.568824 | -1.735594 |
| 61 | 1 | 0 | 2.767125  | -0.094900 | 4.049184  |
| 62 | 1 | 0 | 2.270765  | -1.783349 | 3.737060  |
| 63 | 1 | 0 | 3.909018  | -1.228221 | 3.269280  |

-----

The calculated proton and  $^{13}\text{C}$  chemical shifts and coupling constants for **(15)**:

**(15)**:  $^1\text{H}$  NMR,  $\delta$  (ppm): 3.85 (3H, s,  $\text{OCH}_3$ ), 3.72 (2H, s,  $\text{CH}_2$ ), 7.18 (2H, d,  $^3J = 7.7$  Hz H2, H2'), 6.18 (2H, d(AB spin system),  $^3J = 11.5$  Hz, H10, H10'), 6.38 (2H, d, H1, H1'), 6.33 (2H, d(AB spin system), H11, H11'), 6.71 (2H, d,  $^3J = 8.2$  Hz H9, H9'), 7.63 (2H, dd,  $^3J = 8.2$  Hz,  $^4J = 1.3$  Hz, H8, H8'), 7.70 (2H, d, H6, H6').  $^{13}\text{C}$  NMR,  $\delta$  (ppm): 23.96 ( $\text{CH}_2$ ), 52.25( $2\times\text{OCH}_3$ ), 112.93(C1, C1'), 107.00(C6, C6'), 108.83(C8, C8'), 115.08(C2, C2'), 116.78 (C10, C10'), 116.82(C9, C9'), 117.96 (C12, C12'), 128.81 (C3, C3'), 124.71 (C11, C11'), 127.96(C15, C15'), 139.08(C13, C13'), 134.89 (C7, C7'), 137.01(C4, C4'), 143.40 (C14, C14').



The calculated coordinates of **(16)** ( the part of calculated log file):

After PCM corrections, the SCF energy is -1742.85221598 a.u.

Standard orientation:

| Center<br>Number | Atomic<br>Number | Atomic<br>Type | Coordinates (Angstroms) |           |           |
|------------------|------------------|----------------|-------------------------|-----------|-----------|
|                  |                  |                | X                       | Y         | Z         |
| 1                | 6                | 0              | 5.152267                | -0.493797 | 0.476884  |
| 2                | 6                | 0              | 5.487337                | -0.962536 | 1.766123  |
| 3                | 6                | 0              | 4.869477                | -0.440122 | 2.980657  |
| 4                | 6                | 0              | 3.639517                | 0.111727  | 3.093330  |
| 5                | 6                | 0              | 2.655451                | 0.331236  | 2.036539  |
| 6                | 6                | 0              | 3.014687                | 0.498922  | 0.688835  |
| 7                | 8                | 0              | 4.351281                | 0.624400  | 0.321944  |
| 8                | 6                | 0              | 5.705647                | -1.047522 | -0.668410 |
| 9                | 6                | 0              | 6.642974                | -2.071093 | -0.528476 |
| 10               | 6                | 0              | 7.031356                | -2.547461 | 0.724071  |
| 11               | 6                | 0              | 6.450732                | -1.987478 | 1.854090  |
| 12               | 6                | 0              | 1.284194                | 0.356047  | 2.344323  |
| 13               | 6                | 0              | 0.323505                | 0.505130  | 1.350098  |
| 14               | 6                | 0              | 0.683625                | 0.656485  | 0.005648  |
| 15               | 6                | 0              | 2.053086                | 0.651846  | -0.316133 |
| 16               | 6                | 0              | -0.347284               | 0.777099  | -1.108336 |
| 17               | 6                | 0              | -1.689728               | 1.336643  | -0.693292 |
| 18               | 6                | 0              | -2.804721               | 0.512561  | -0.559675 |
| 19               | 6                | 0              | -4.070871               | 0.997181  | -0.180372 |
| 20               | 6                | 0              | -4.180905               | 2.370650  | 0.070106  |
| 21               | 6                | 0              | -3.083666               | 3.225081  | -0.052832 |
| 22               | 6                | 0              | -1.838036               | 2.717127  | -0.435186 |
| 23               | 6                | 0              | -5.237590               | 0.088984  | -0.058971 |
| 24               | 6                | 0              | -6.215145               | 0.279193  | 0.937368  |
| 25               | 6                | 0              | -7.310471               | -0.565925 | 1.050627  |
| 26               | 6                | 0              | -7.468772               | -1.644346 | 0.166629  |
| 27               | 6                | 0              | -6.509112               | -1.855436 | -0.830786 |
| 28               | 6                | 0              | -5.415671               | -0.992977 | -0.932938 |

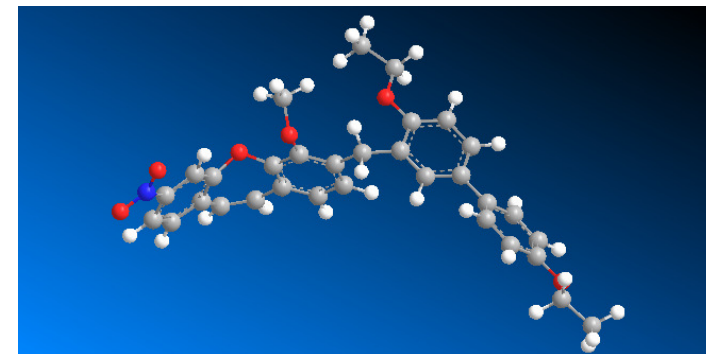

|    |   |   |            |           |           |
|----|---|---|------------|-----------|-----------|
| 29 | 8 | 0 | -0.712716  | 3.476051  | -0.591823 |
| 30 | 8 | 0 | -8.576563  | -2.417366 | 0.360169  |
| 31 | 6 | 0 | -0.782850  | 4.877202  | -0.313508 |
| 32 | 6 | 0 | 0.599670   | 5.463619  | -0.536800 |
| 33 | 6 | 0 | -8.790920  | -3.538349 | -0.501595 |
| 34 | 6 | 0 | -10.075916 | -4.216706 | -0.060714 |
| 35 | 8 | 0 | 2.446121   | 0.756271  | -1.631371 |
| 36 | 6 | 0 | 2.931618   | 2.051798  | -2.013305 |
| 37 | 7 | 0 | 7.242467   | -2.648475 | -1.730832 |
| 38 | 8 | 0 | 6.894620   | -2.198776 | -2.825515 |
| 39 | 8 | 0 | 8.064278   | -3.557642 | -1.588263 |
| 40 | 1 | 0 | 5.429146   | -0.612689 | 3.897511  |
| 41 | 1 | 0 | 3.294165   | 0.346894  | 4.098613  |
| 42 | 1 | 0 | 5.424001   | -0.674584 | -1.644205 |
| 43 | 1 | 0 | 7.768610   | -3.336887 | 0.797129  |
| 44 | 1 | 0 | 6.737172   | -2.351727 | 2.836749  |
| 45 | 1 | 0 | 0.975964   | 0.236878  | 3.379940  |
| 46 | 1 | 0 | -0.728236  | 0.514168  | 1.618499  |
| 47 | 1 | 0 | 0.077294   | 1.388328  | -1.909450 |
| 48 | 1 | 0 | -0.500743  | -0.220243 | -1.543717 |
| 49 | 1 | 0 | -2.678862  | -0.552387 | -0.740540 |
| 50 | 1 | 0 | -5.144608  | 2.794203  | 0.339257  |
| 51 | 1 | 0 | -3.216016  | 4.284006  | 0.137005  |
| 52 | 1 | 0 | -6.101620  | 1.091199  | 1.650630  |
| 53 | 1 | 0 | -8.055001  | -0.416947 | 1.827246  |
| 54 | 1 | 0 | -6.605835  | -2.672837 | -1.536215 |
| 55 | 1 | 0 | -4.698437  | -1.158803 | -1.732333 |
| 56 | 1 | 0 | -1.520854  | 5.350692  | -0.975893 |
| 57 | 1 | 0 | -1.111085  | 5.031084  | 0.723712  |
| 58 | 1 | 0 | 0.588302   | 6.537994  | -0.324344 |
| 59 | 1 | 0 | 1.332567   | 4.987369  | 0.122054  |
| 60 | 1 | 0 | 0.918479   | 5.321121  | -1.574508 |
| 61 | 1 | 0 | -8.864995  | -3.197162 | -1.543768 |
| 62 | 1 | 0 | -7.938395  | -4.228601 | -0.432285 |
| 63 | 1 | 0 | -10.278108 | -5.085044 | -0.696775 |
| 64 | 1 | 0 | -9.997326  | -4.557165 | 0.976695  |

|    |   |   |            |           |           |
|----|---|---|------------|-----------|-----------|
| 65 | 1 | 0 | -10.922731 | -3.527068 | -0.135611 |
| 66 | 1 | 0 | 3.161586   | 1.987031  | -3.079253 |
| 67 | 1 | 0 | 2.163553   | 2.817232  | -1.848860 |
| 68 | 1 | 0 | 3.837666   | 2.311075  | -1.456589 |

---

The calculated proton and  $^{13}\text{C}$  chemical shifts and coupling constants for **(16)**:

**(16)**:  $^1\text{H}$  NMR,  $\delta$  (ppm): 4.20 (2H, s,  $\text{CH}_2$ ), dibenzo[*b,f*]oxepin ring: 8.49 (1H, d,  $^4J = 2.5$  Hz, H6), 8.36 (1H, dd,  $^3J = 8.5$  Hz, H8), 7.41 (H, d, H9), 7.03 (1H, d(AB spin system),  $^3J = 11.4$  Hz, H11), 6.78 (1H, d(AB spin system),  $^3J = 8.5$  Hz, H2), 6.93 (1H, d(AB spin system), H1), 6.84 (1H, d(AB spin system), H10), 4.26 (3H, s,  $\text{OCH}_3$ ); biphenyl ring: 7.68 (1H, dd,  $^3J = 8.5$  Hz,  $^4J = 2.5$  Hz, H6), 7.75 (2H, d, H2', H6'), 7.70 (1H, d, H2) 7.04 (1H, d,  $^3J = 8.5$  Hz, H5), 7.07 (2H, d,  $^3J = 8.5$  Hz, H3'), 7.16 (H5'), 3.97 (2H, q,  $^3J = 7$  Hz,  $\text{OCH}_2$ ), 4.02 (2H, q,  $^3J = 7$  Hz,  $\text{OCH}_2$ ), 1.30 (3H, t,  $\text{CH}_3$ ); 1.47 (3H, t,  $\text{CH}_3$ ).  $^{13}\text{C}$  NMR,  $\delta$  (ppm): 36.42 ( $\text{CH}_2$ ), dibenzo[*b,f*]oxepin ring: 164.52 (C14), 157.40 (C4), 155.12(C7), 158.88(C13), 147.60(C15), 143.43(C11), 136.26(C12), 150.47(C3), 133.86(C9), 133.33(C10), 130.02(C2), 126.09(C8), 123.69(C6), 129.74(C1), 62.37( $\text{OCH}_3$ ); biphenyl ring: 166.08(C4'), 164.24(C4), 141.10(C1), 140.89(C1'), 134.32(C3), 136.66(C2), 132.02(C6), 113.80(C3'), 122.08(C5'), 114.36(C5), 66.67( $\text{OCH}_2$ ), 66.58( $\text{OCH}_2$ ), 16.81 ( $\text{CH}_3$ ), 16.63( $\text{CH}_3$ ).

Copies of  $^1\text{H}$  NMR and  $^{13}\text{C}$  NMR spectra of (7, 8, 10-13, 15, 16)

$^1\text{H}$  NMR of compound (7)

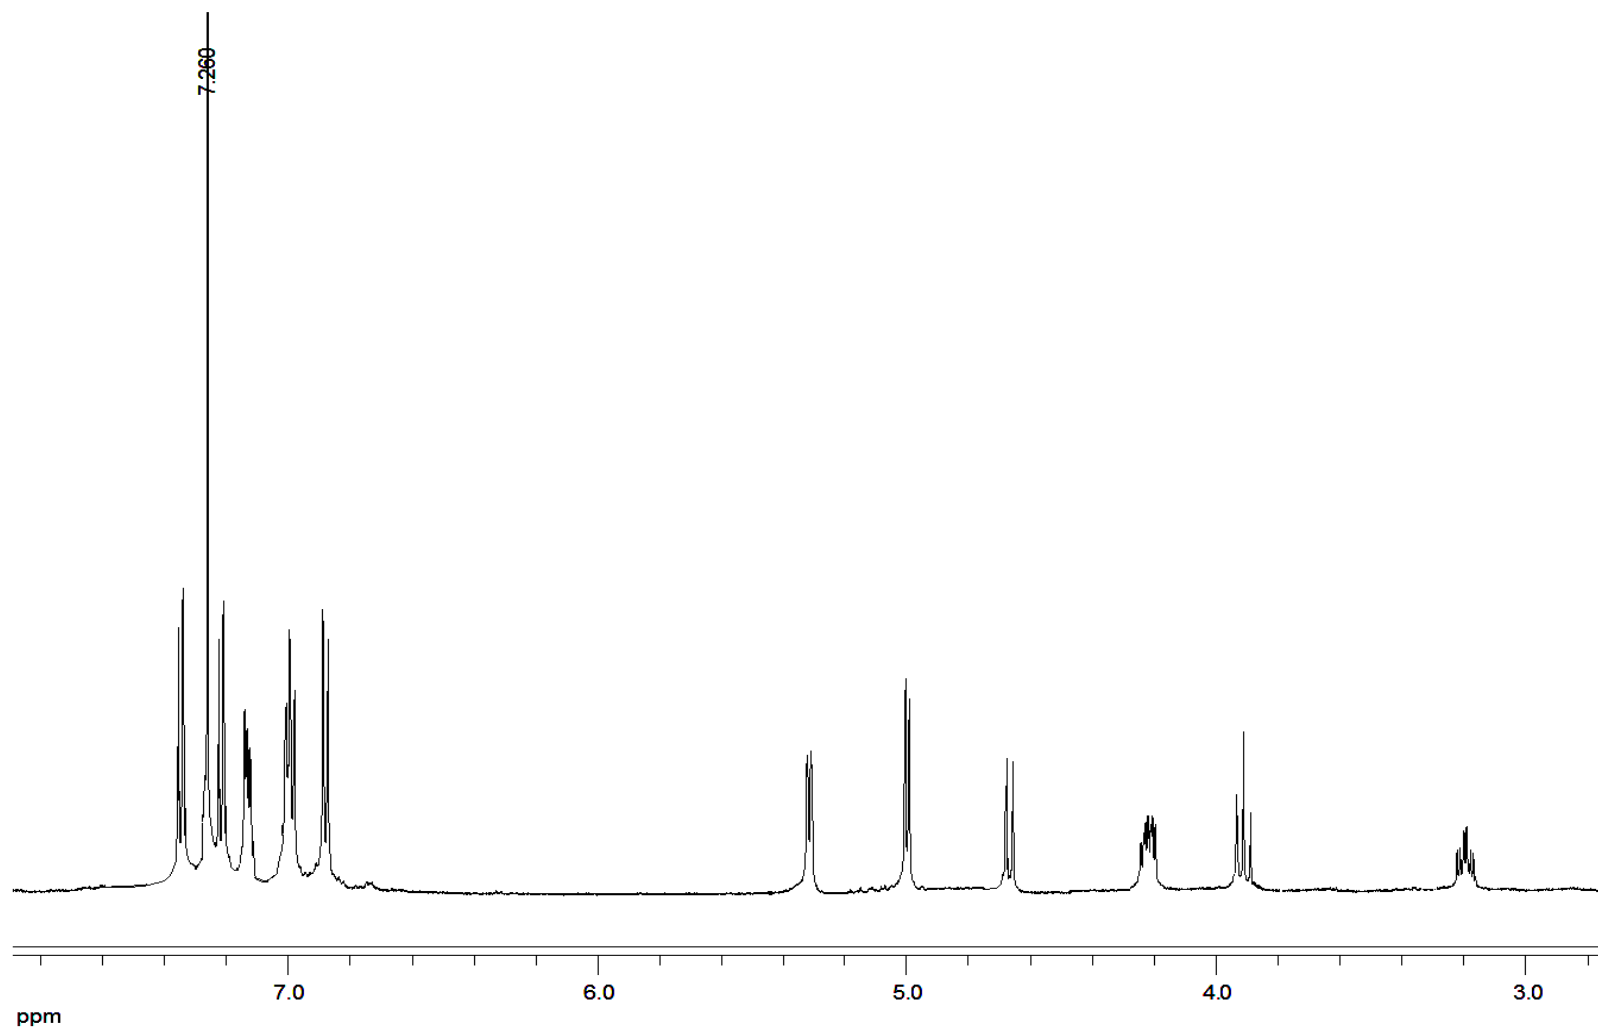

<sup>13</sup>C NMR of compound (7)

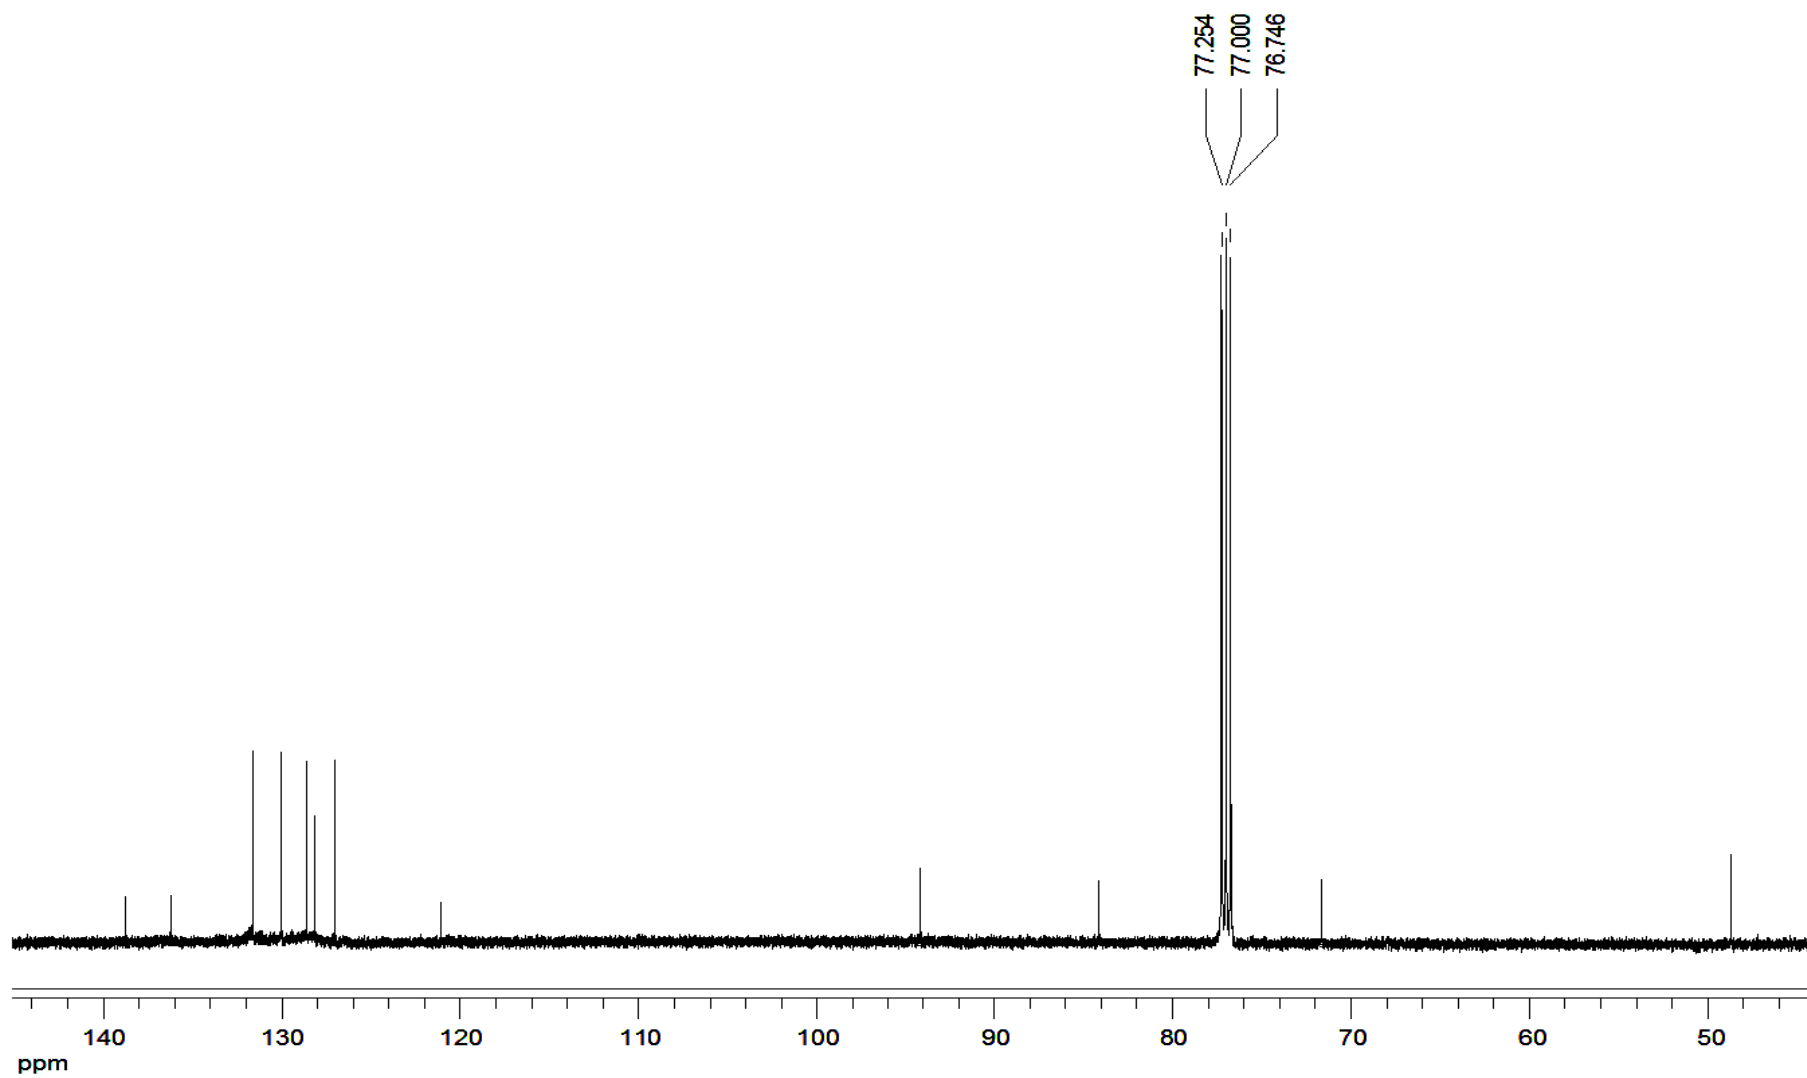

**<sup>1</sup>H NMR of compound (8)**

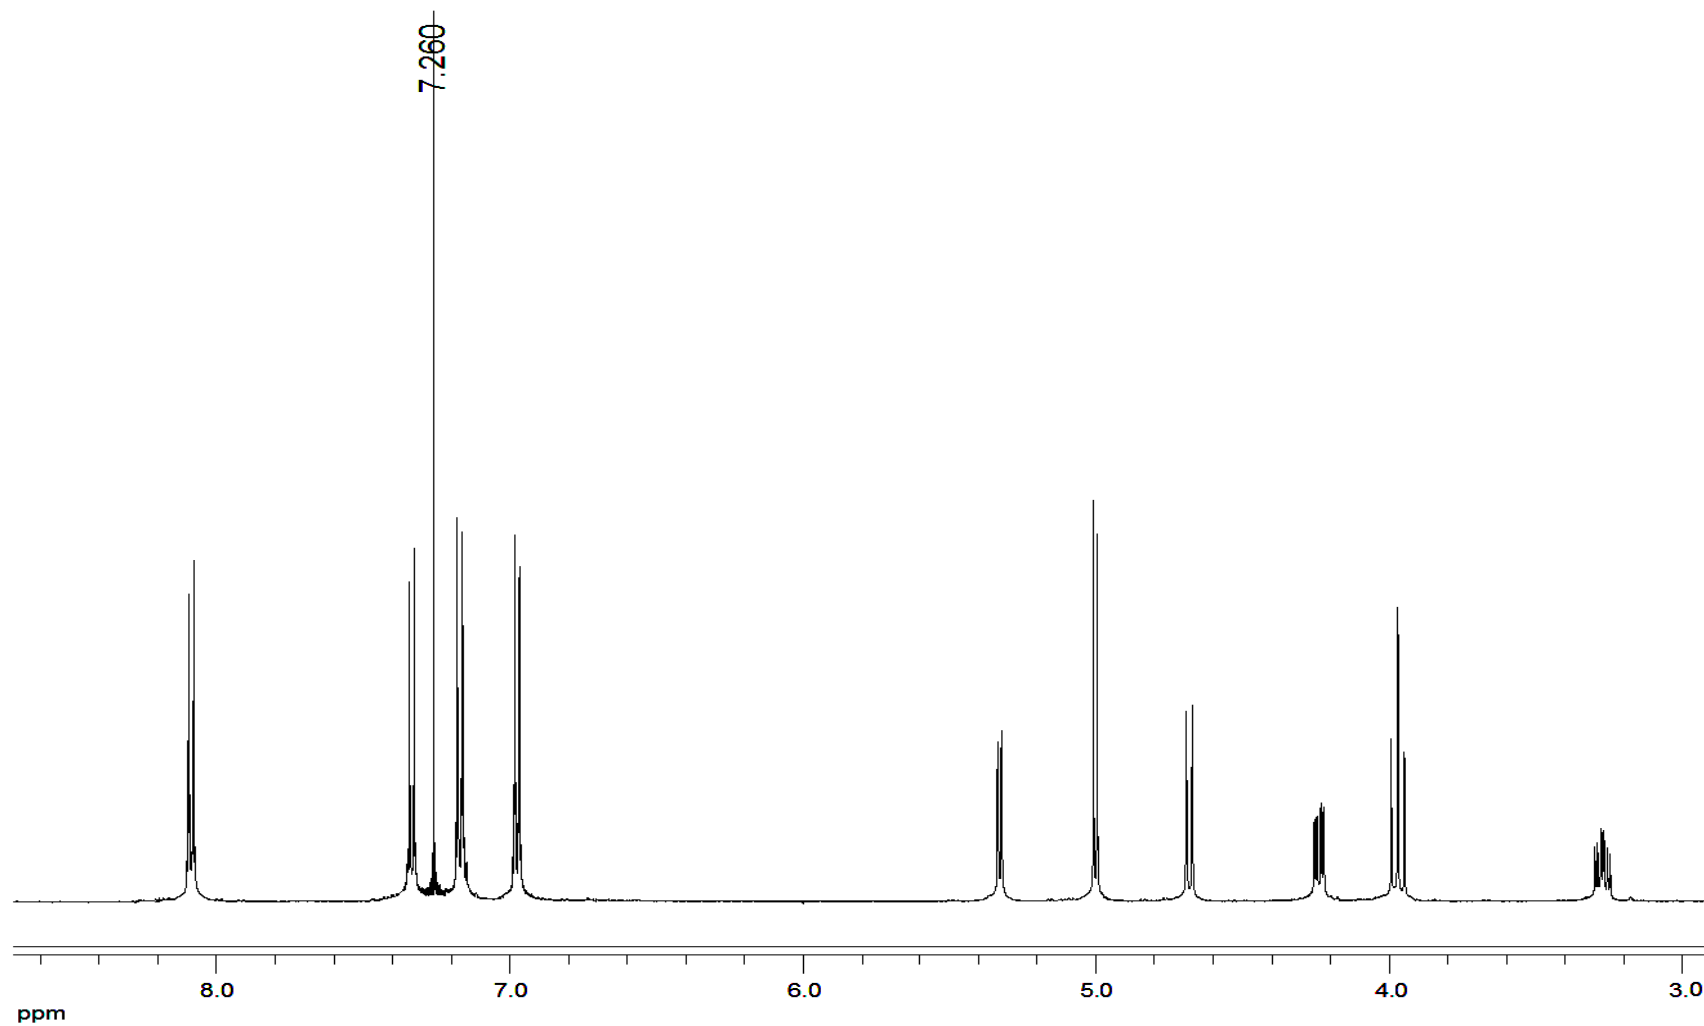

<sup>13</sup>C NMR of compound (8)

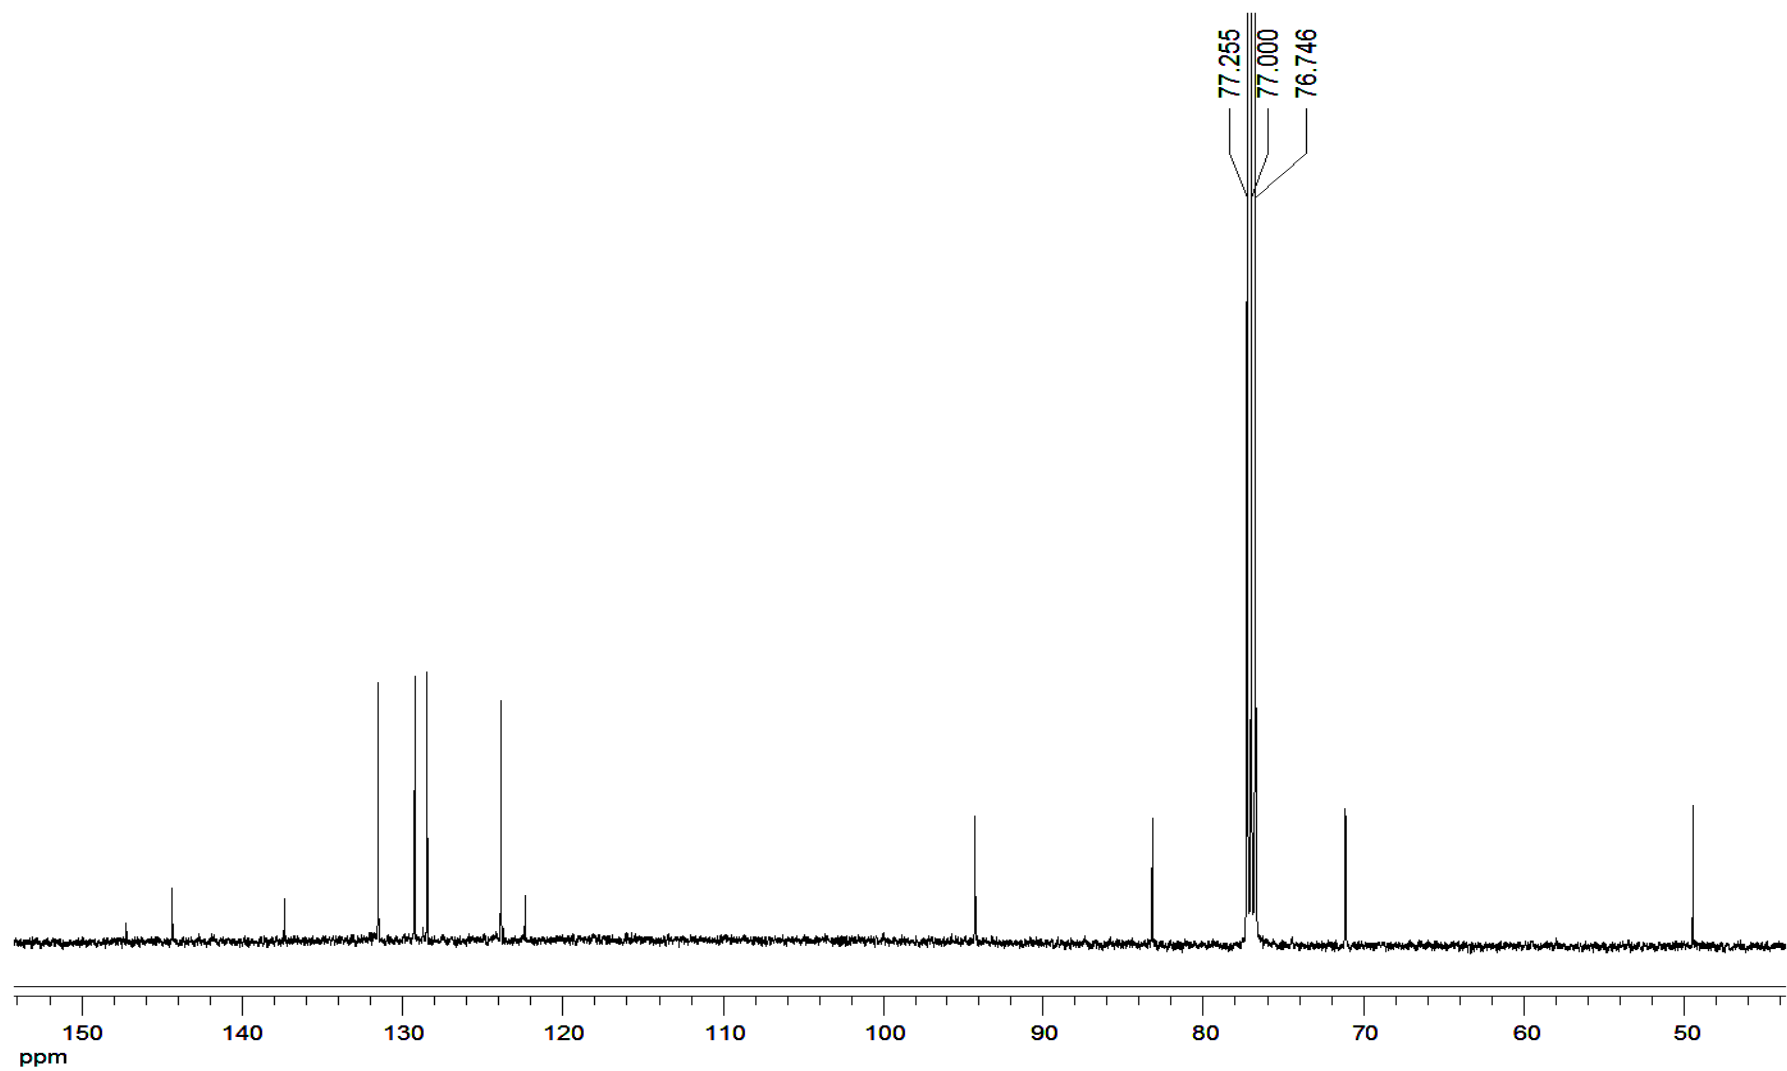

**<sup>1</sup>H NMR of compound (10)**

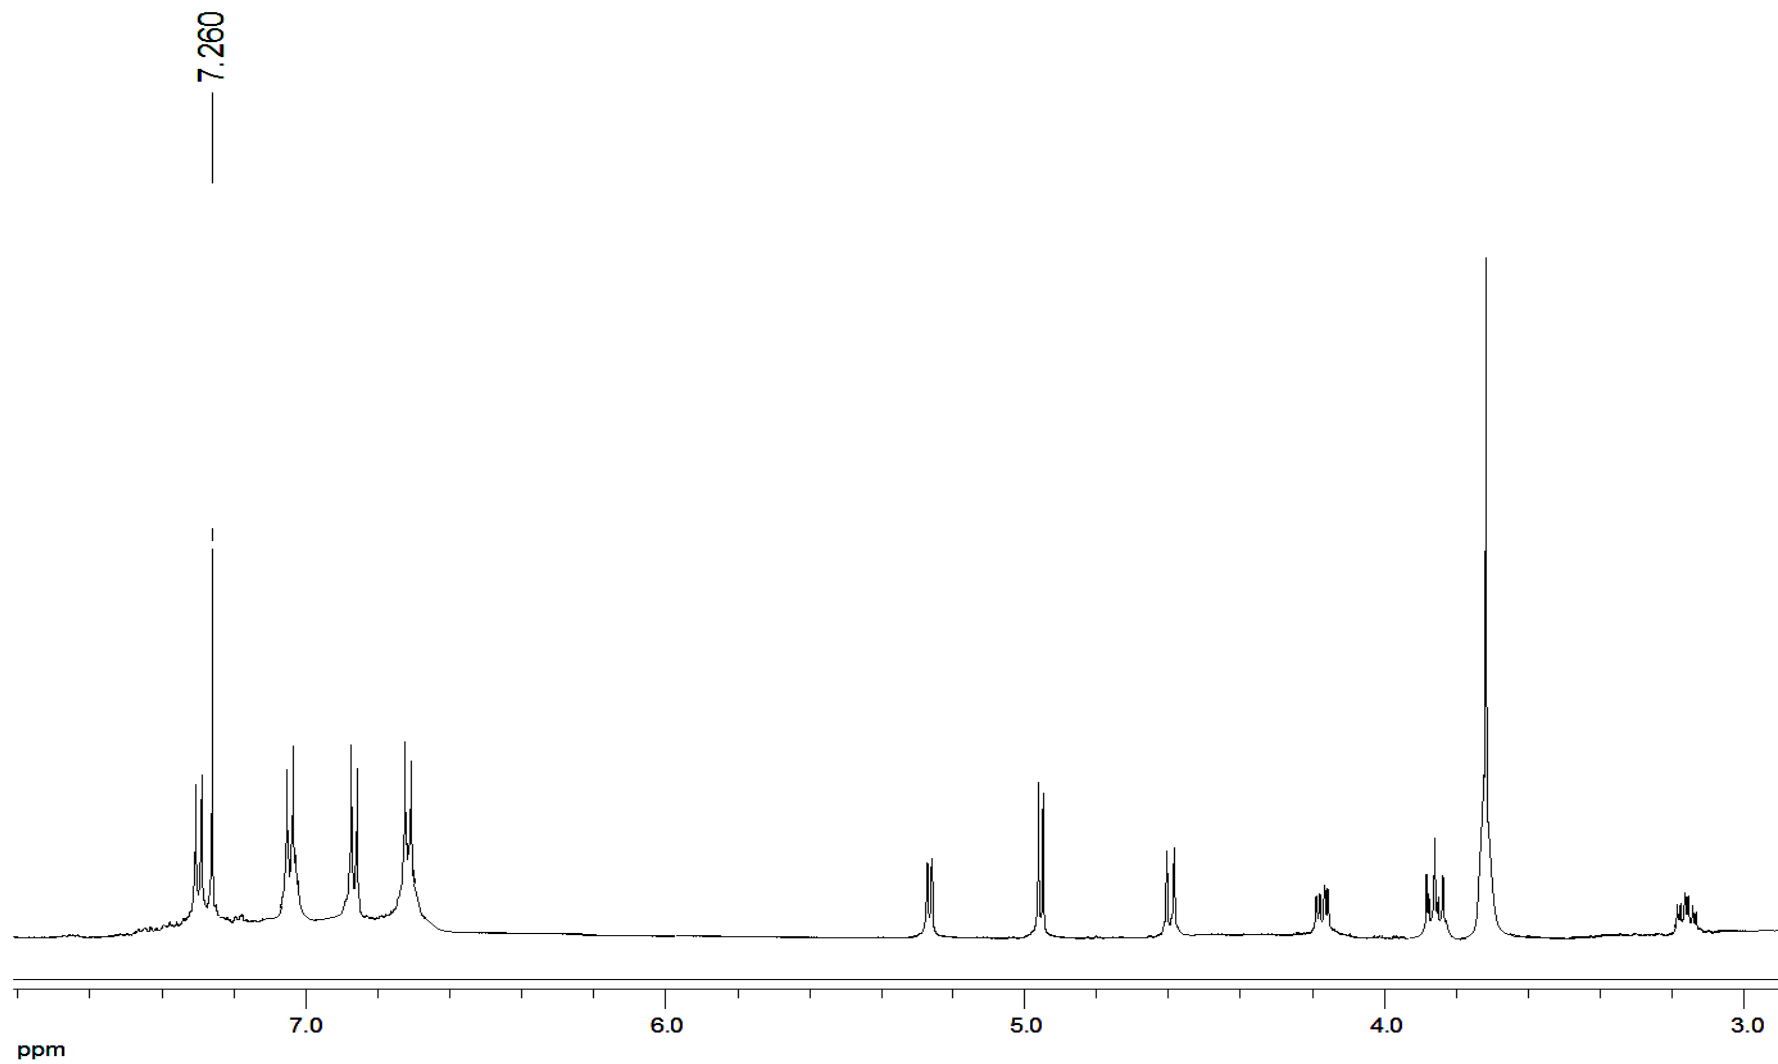



<sup>13</sup>C NMR of compound (10)

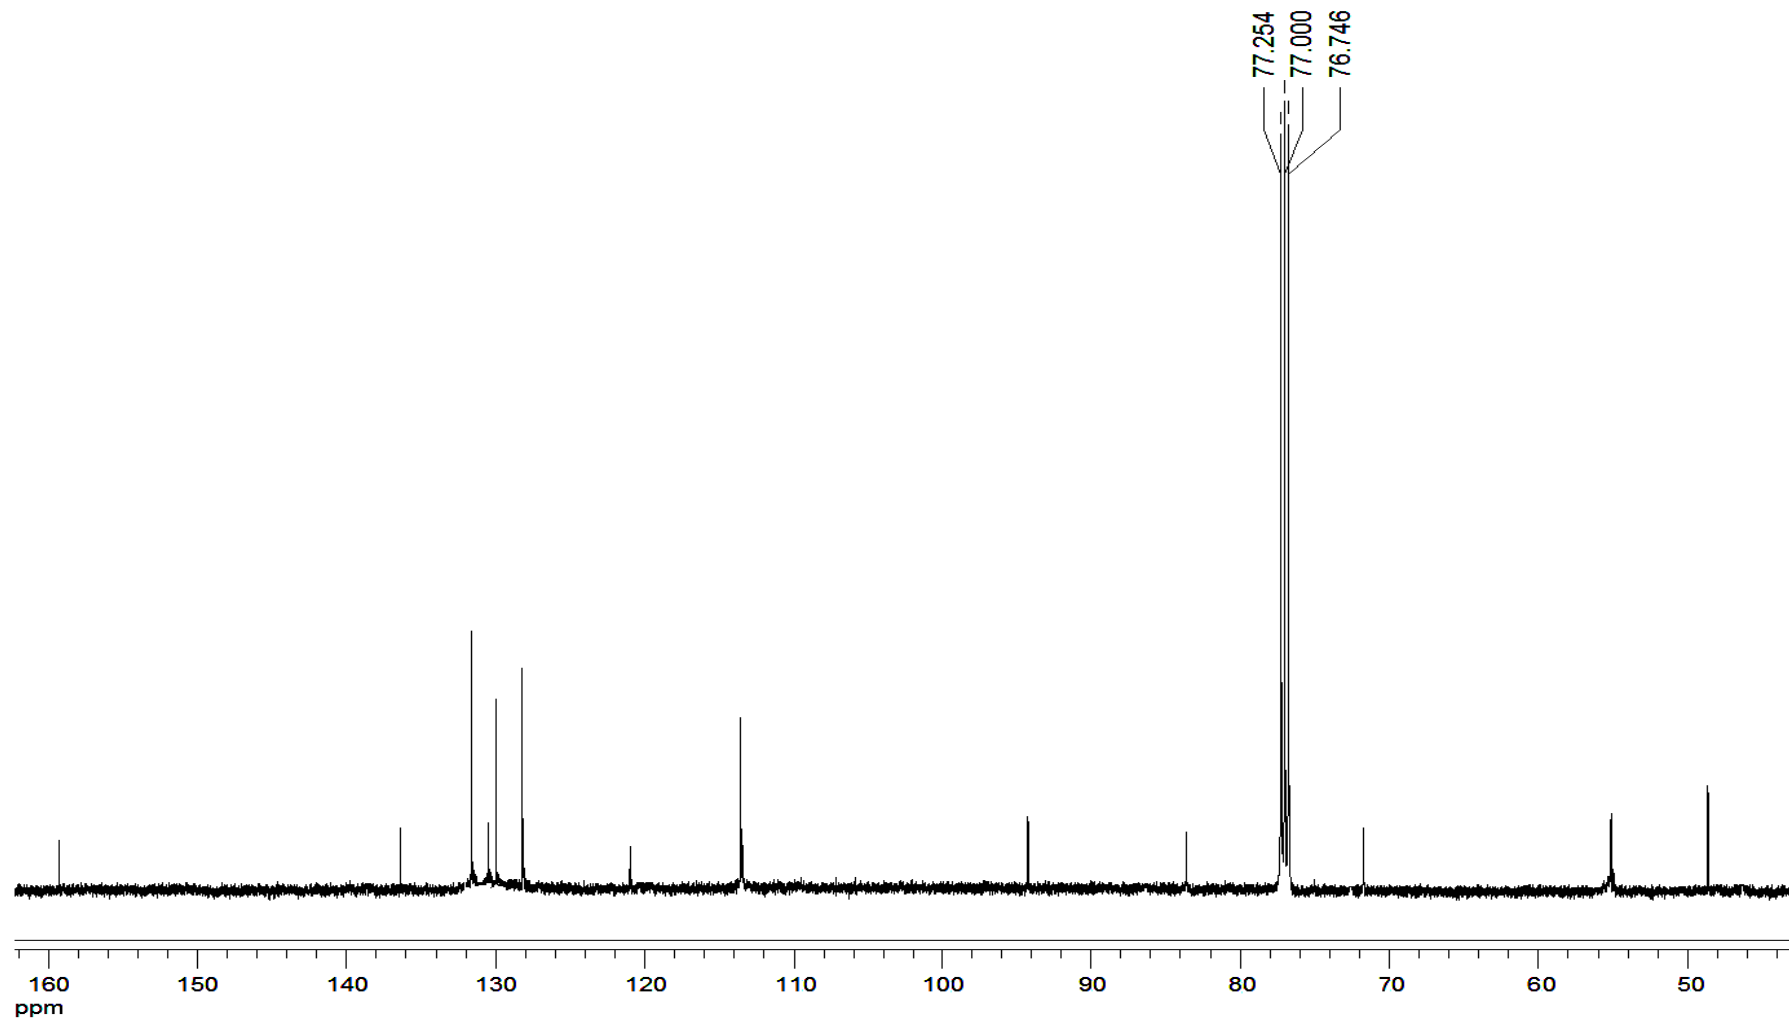

**$^1\text{H}$  NMR of compound (11)**

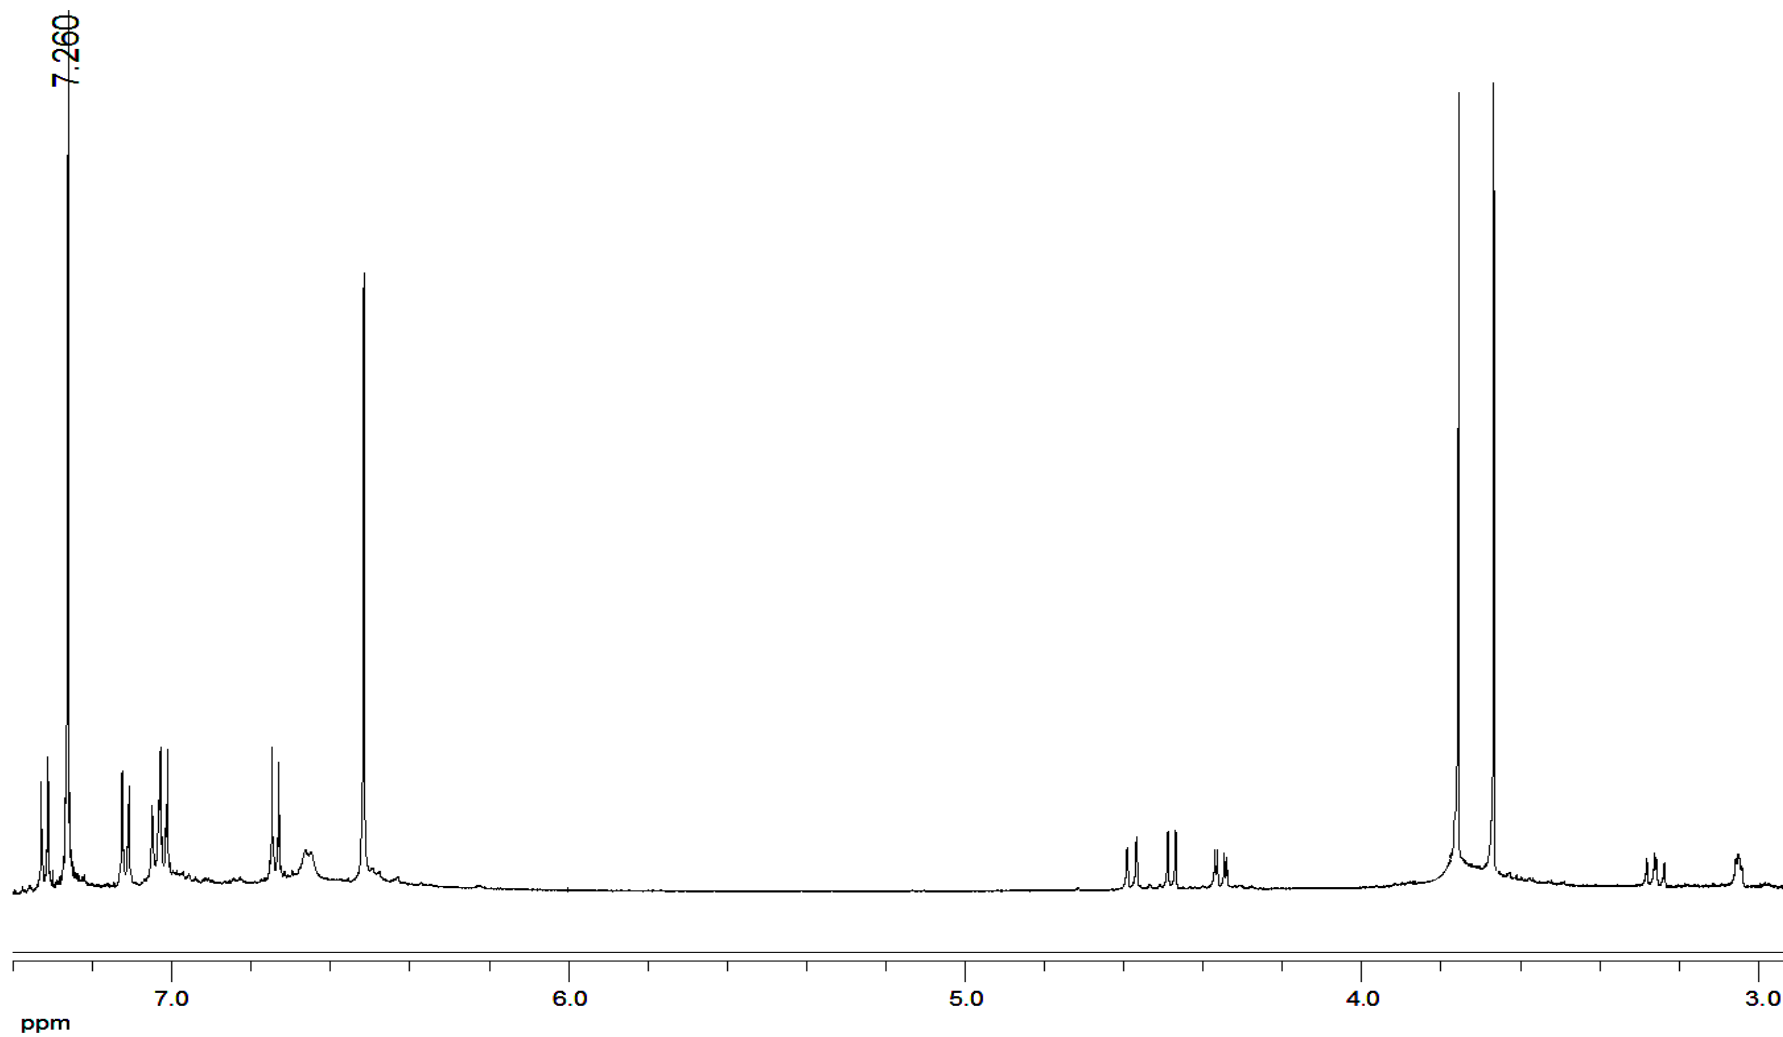

<sup>13</sup>C NMR of compound (11)

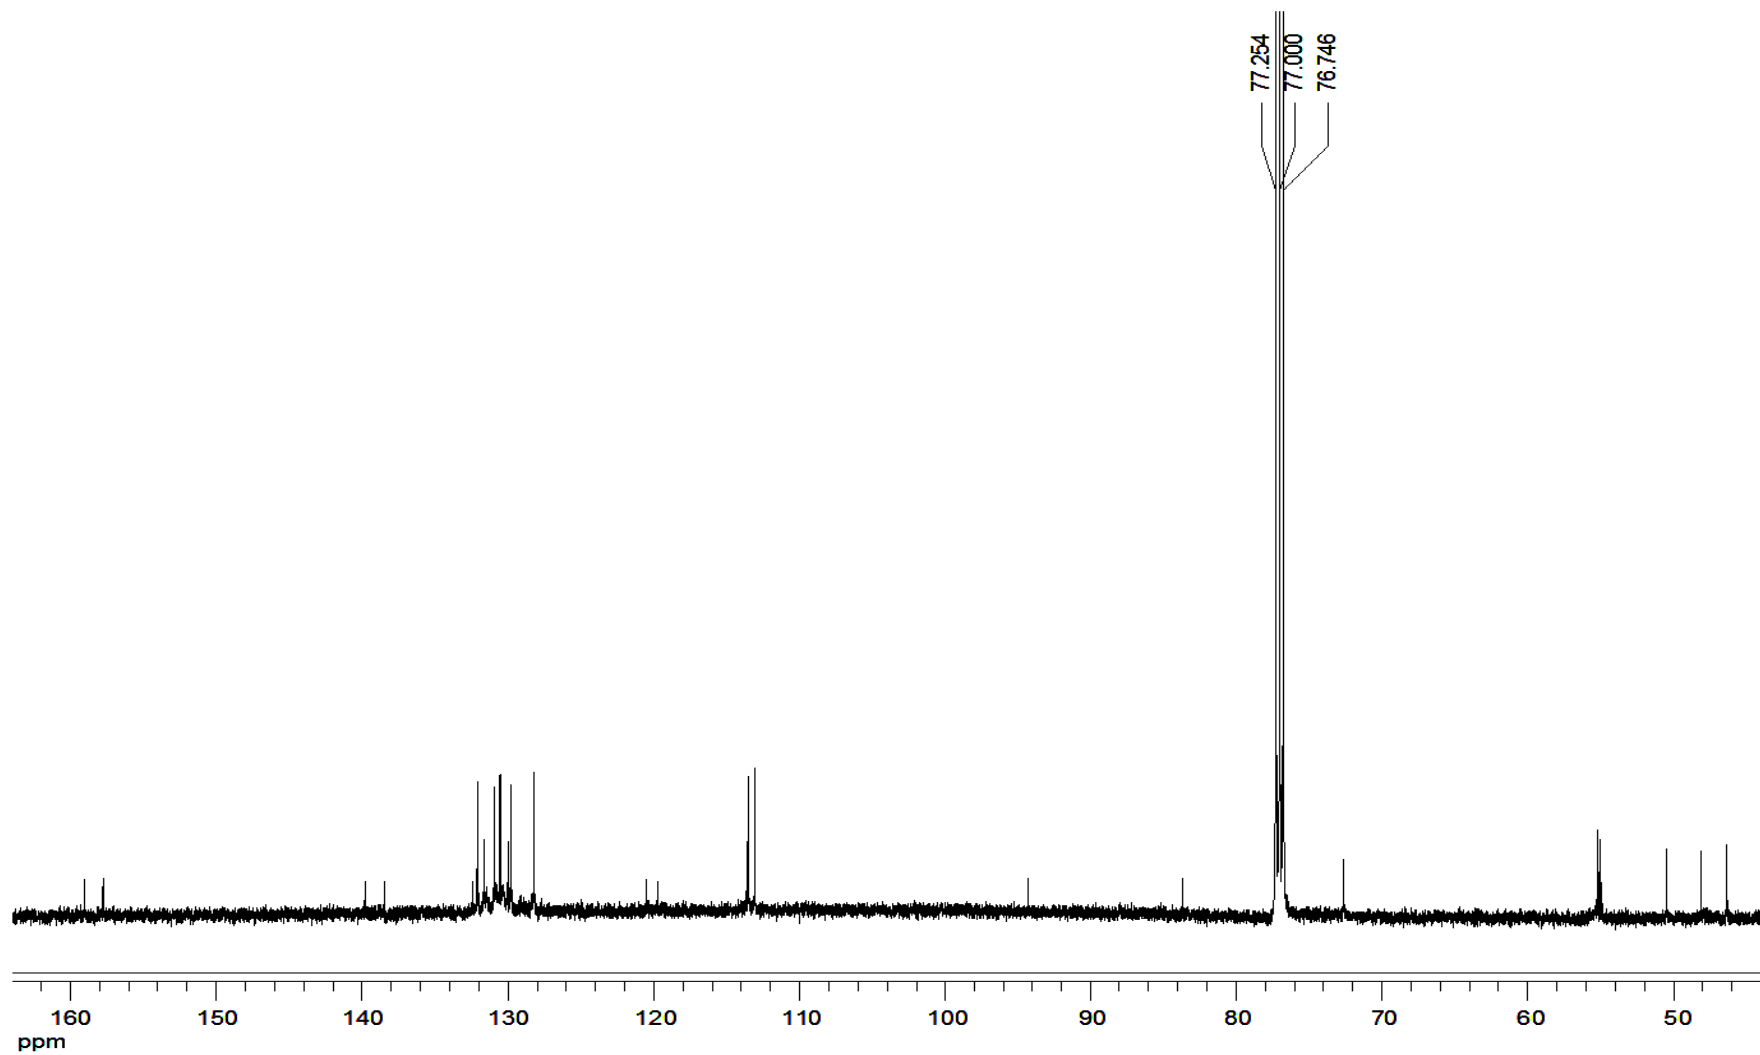

**$^1\text{H}$  NMR of compound (12)**

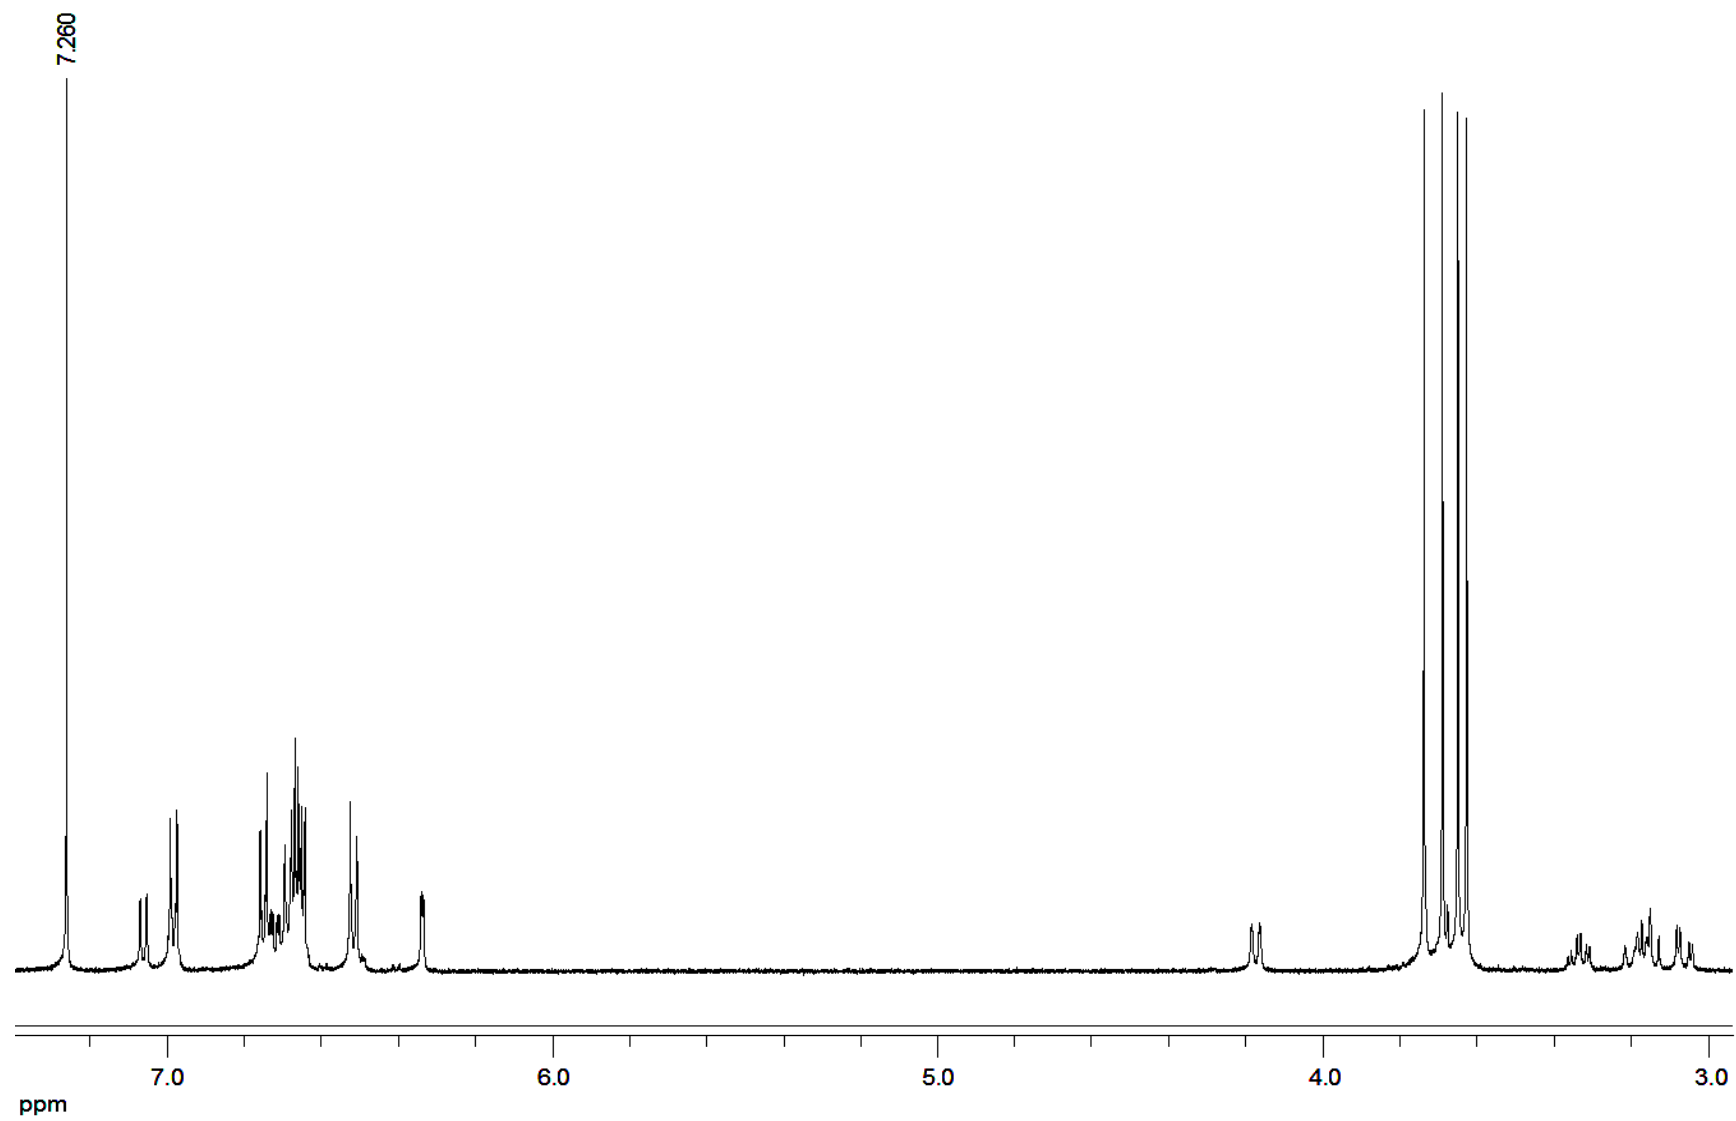

<sup>13</sup>C NMR of compound (12)

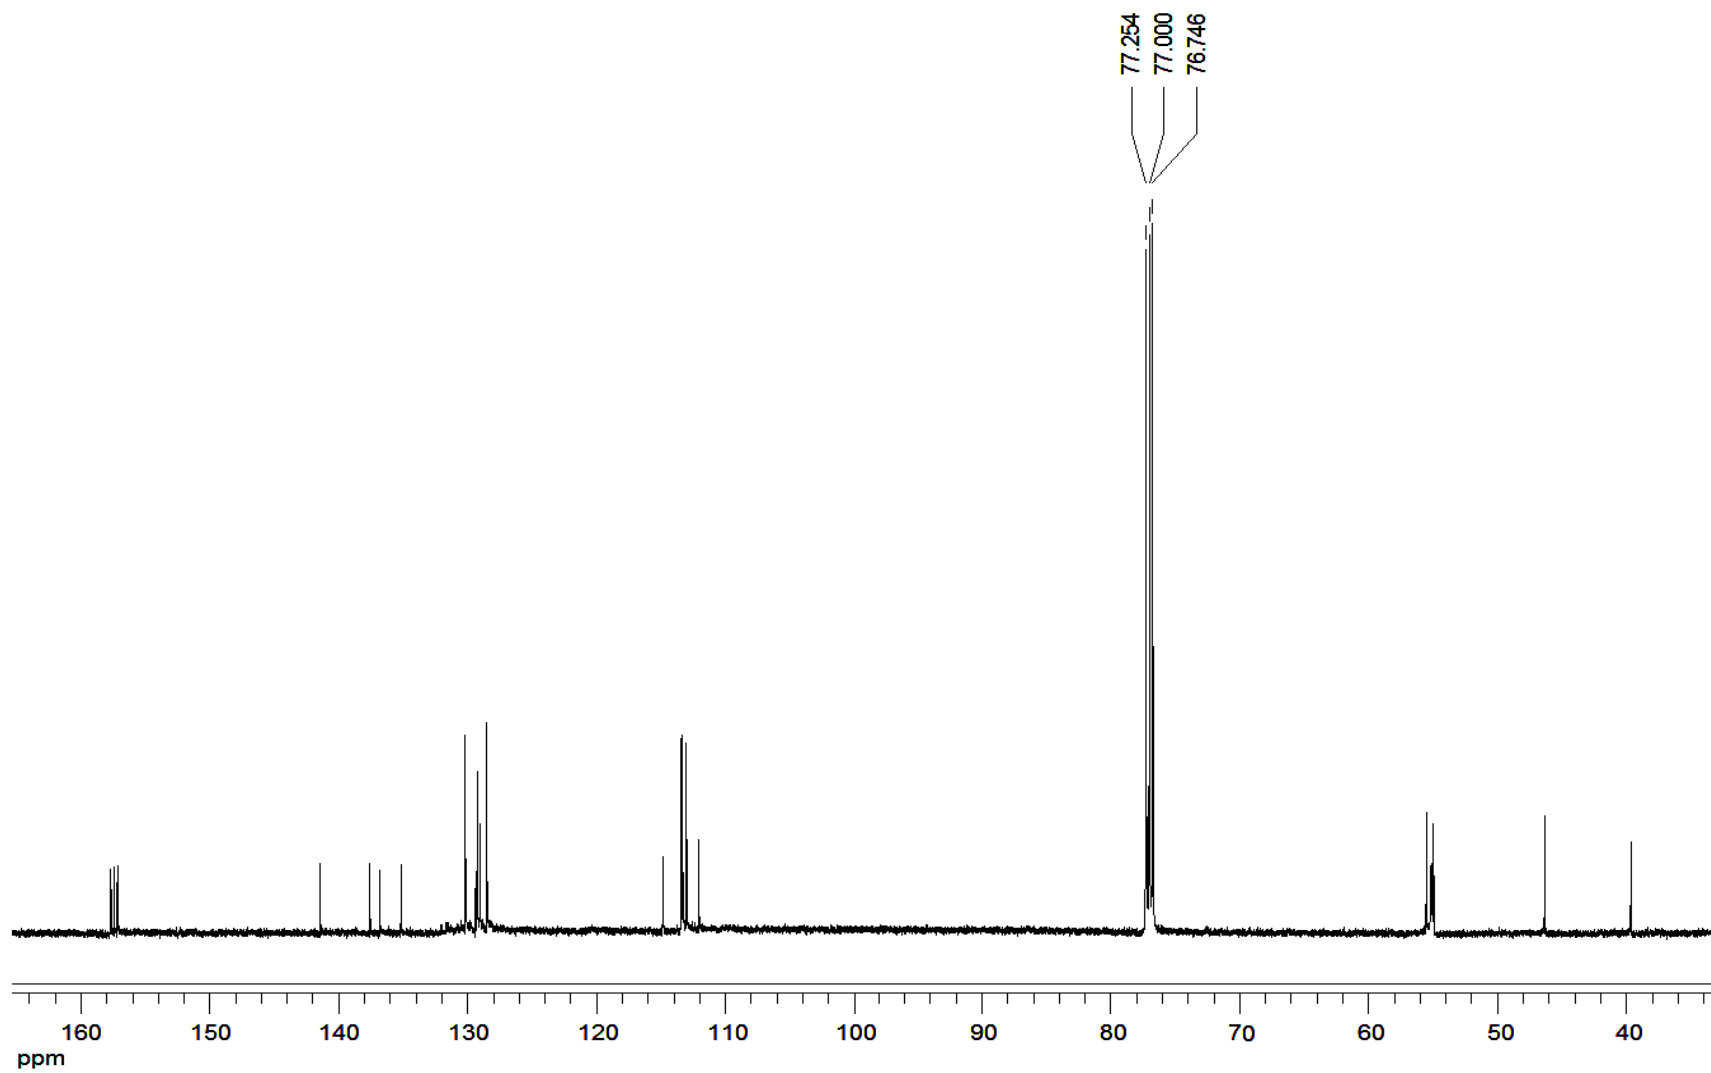

<sup>1</sup>H NMR of compound (13)

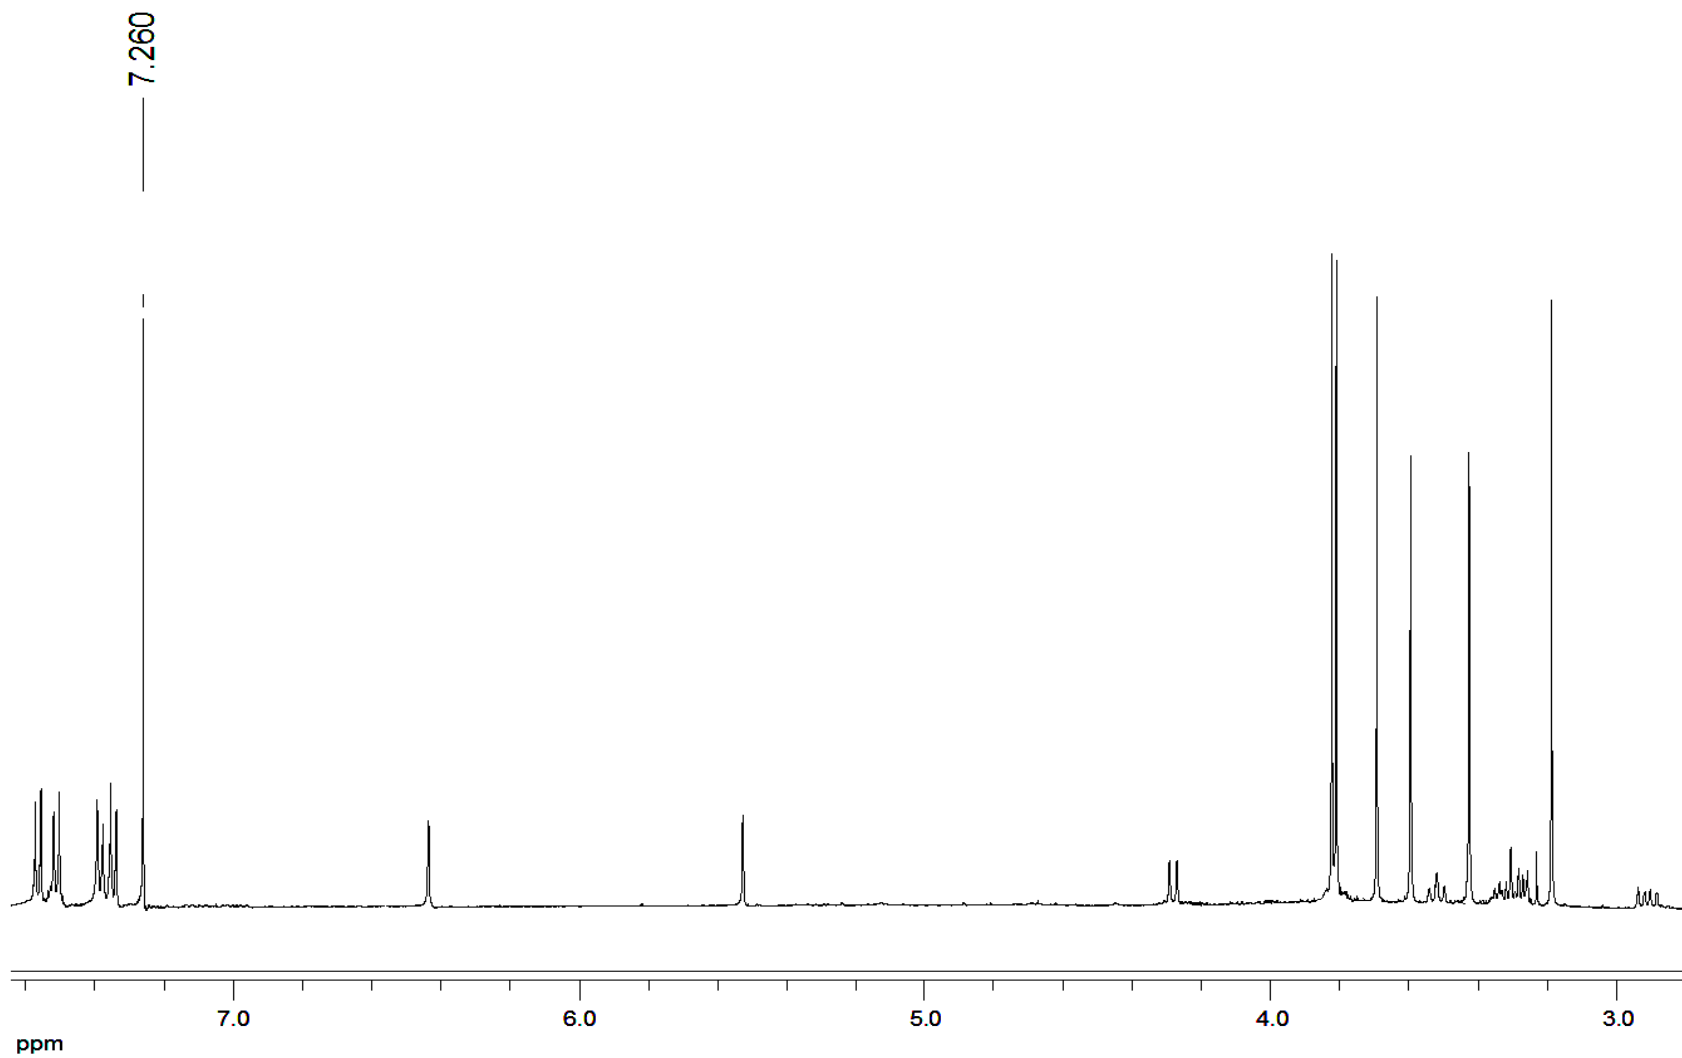

**$^{13}\text{C}$  NMR of compound (13)**

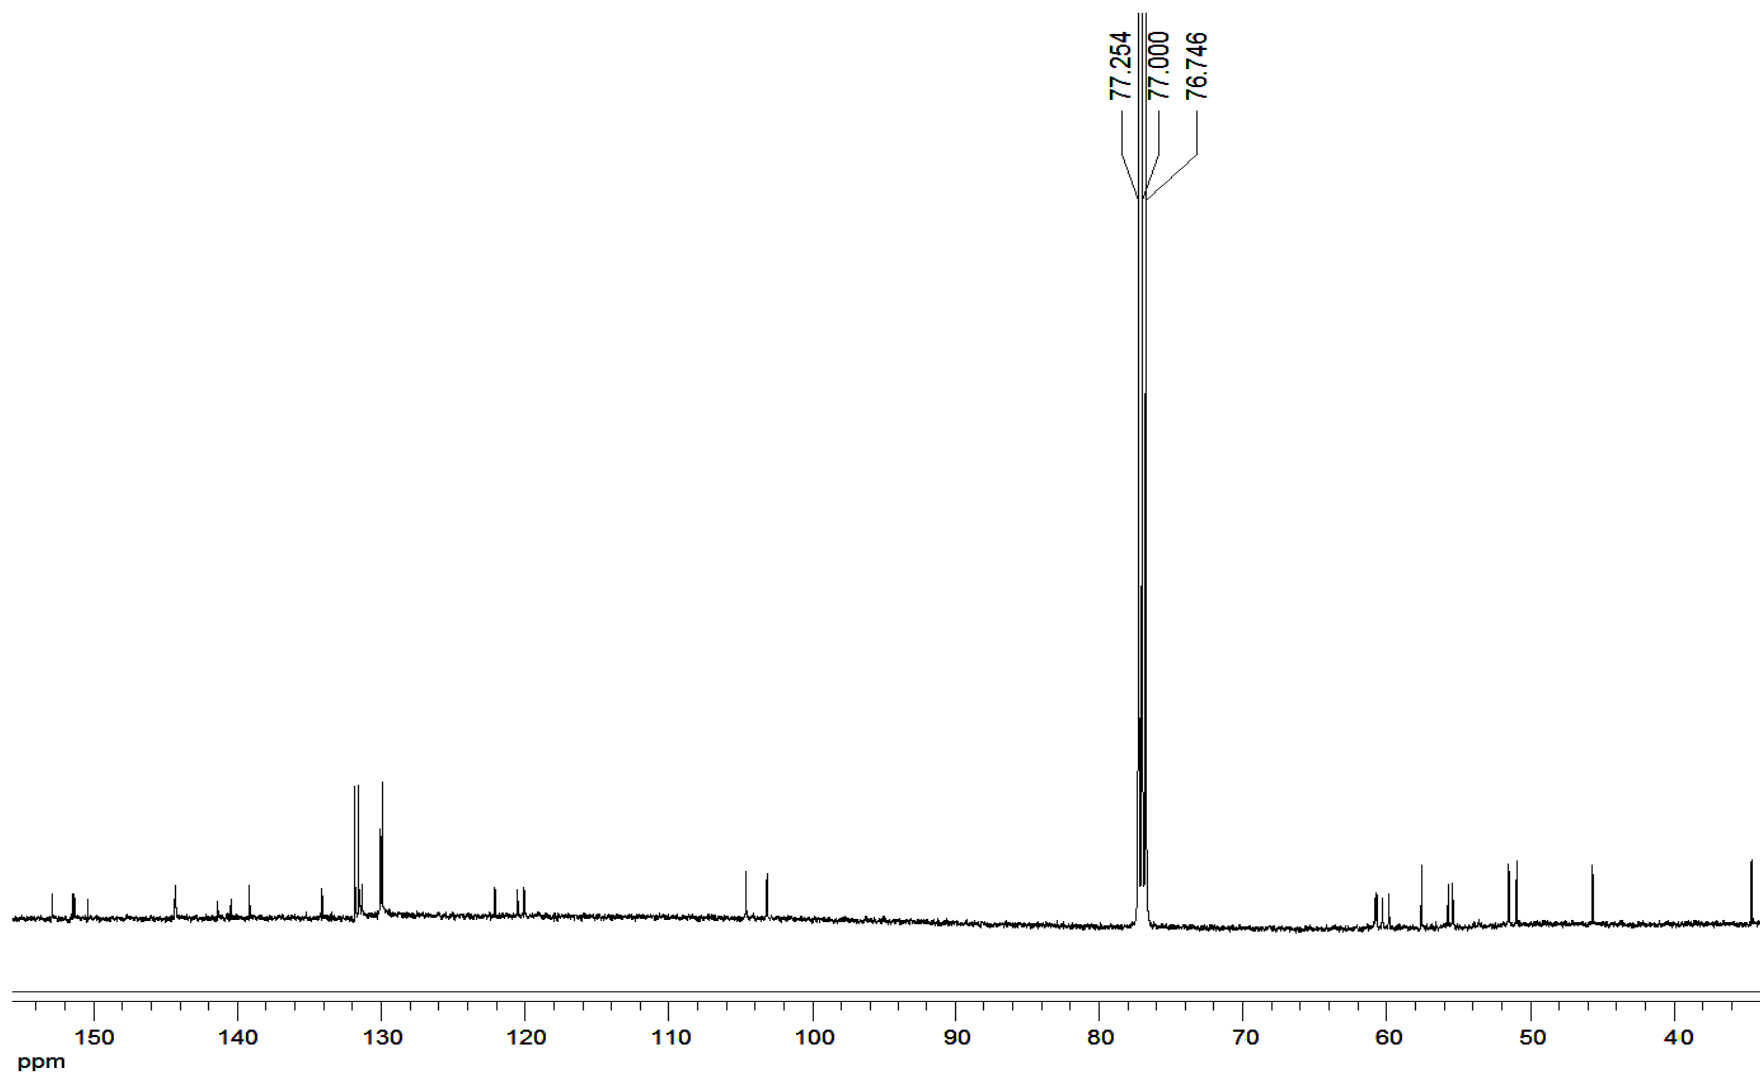

**$^1\text{H}$  NMR of compound (15)**

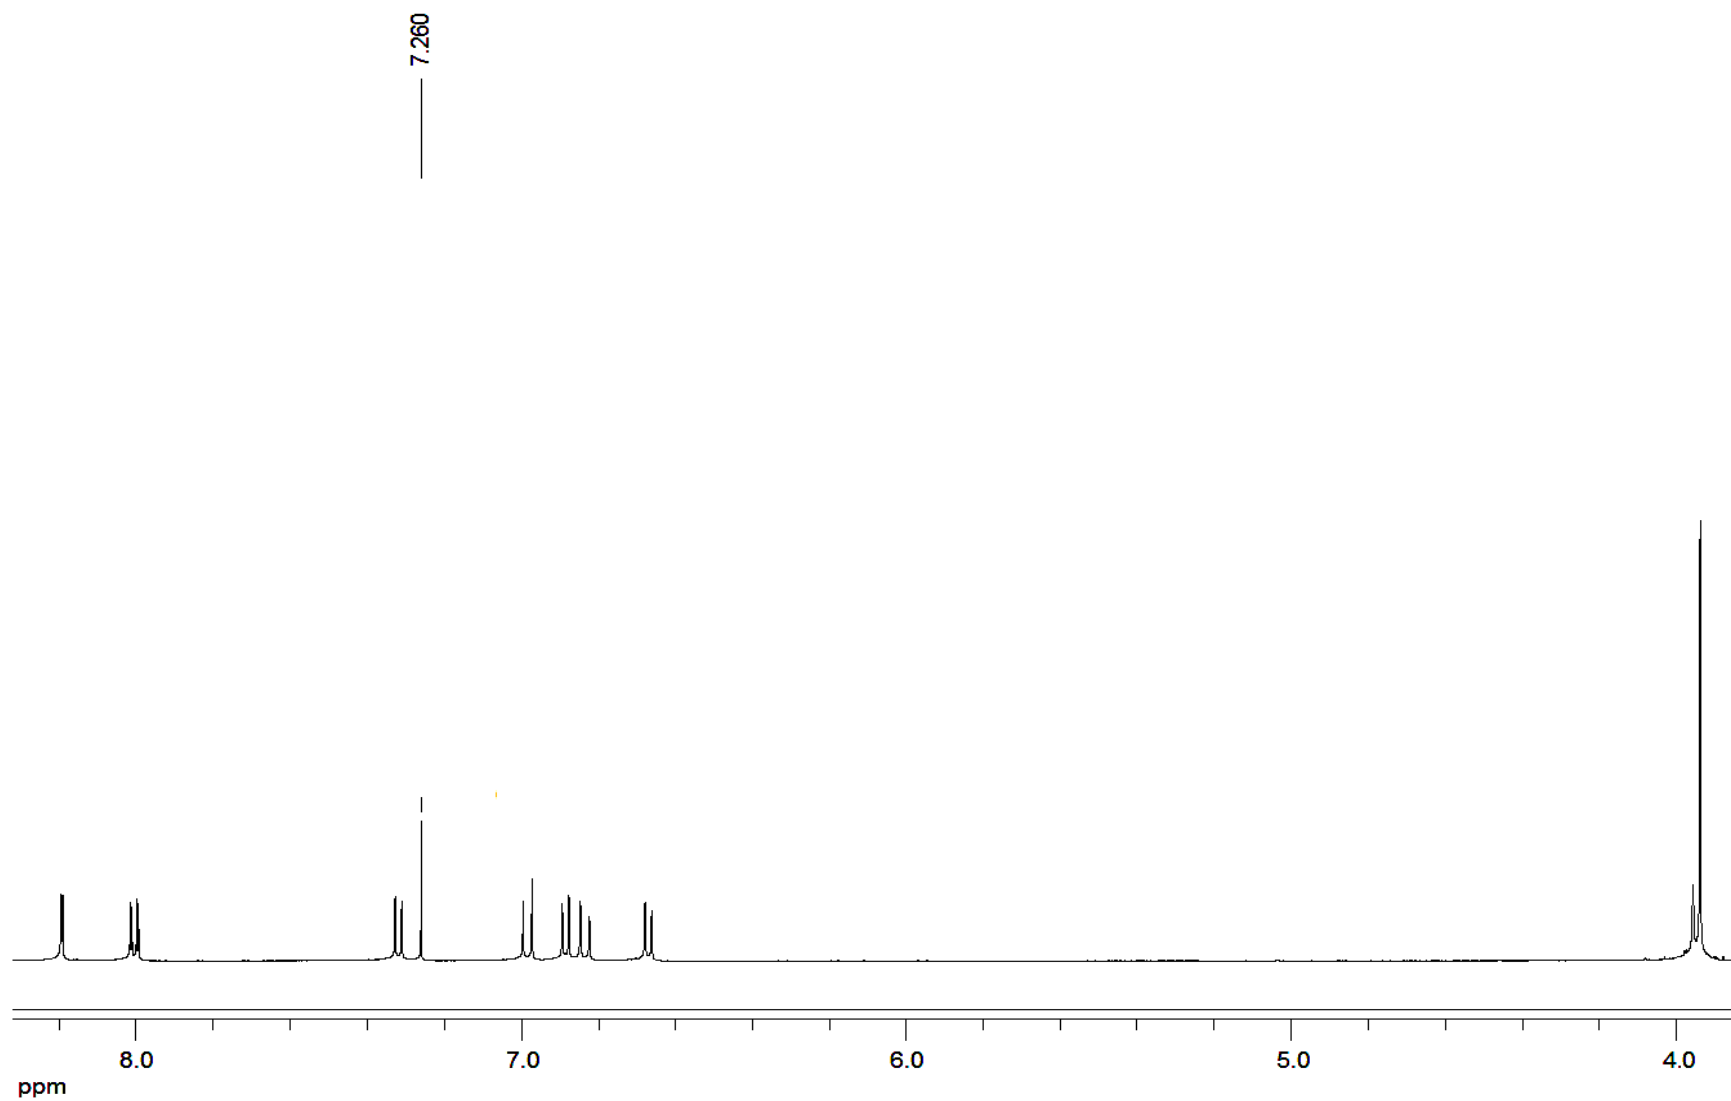



<sup>13</sup>C NMR of compound (15)

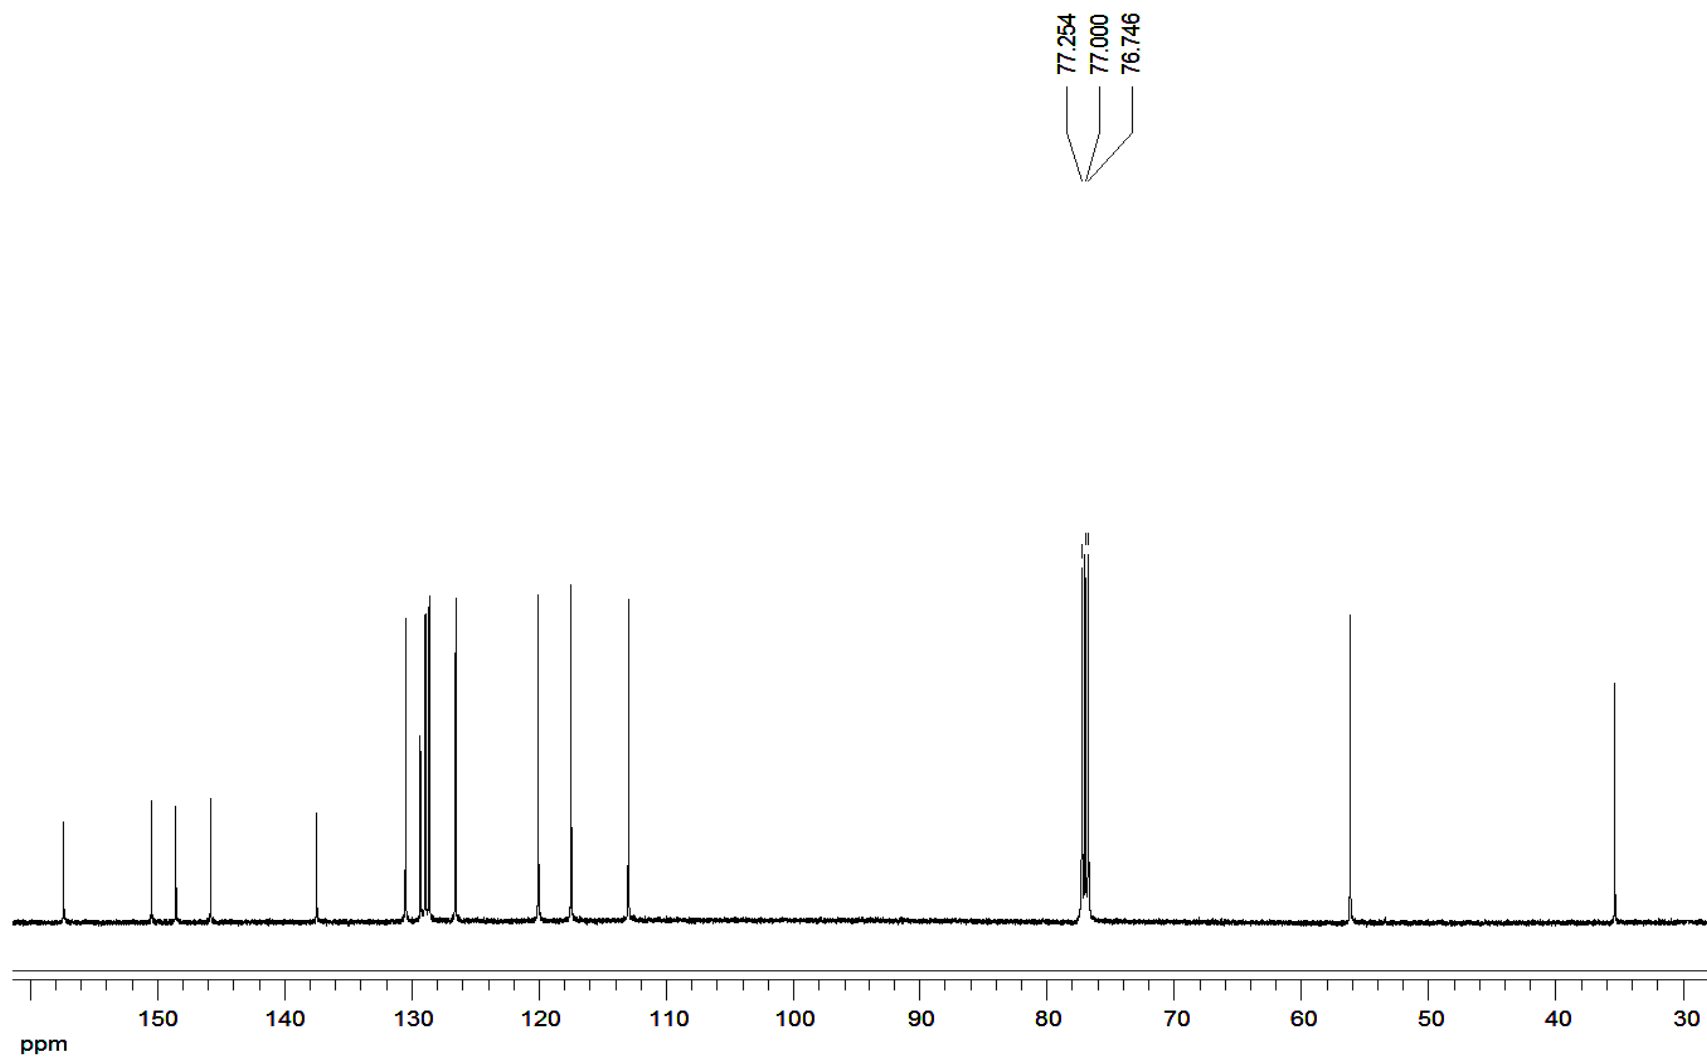

**<sup>1</sup>H NMR of compound (16)**

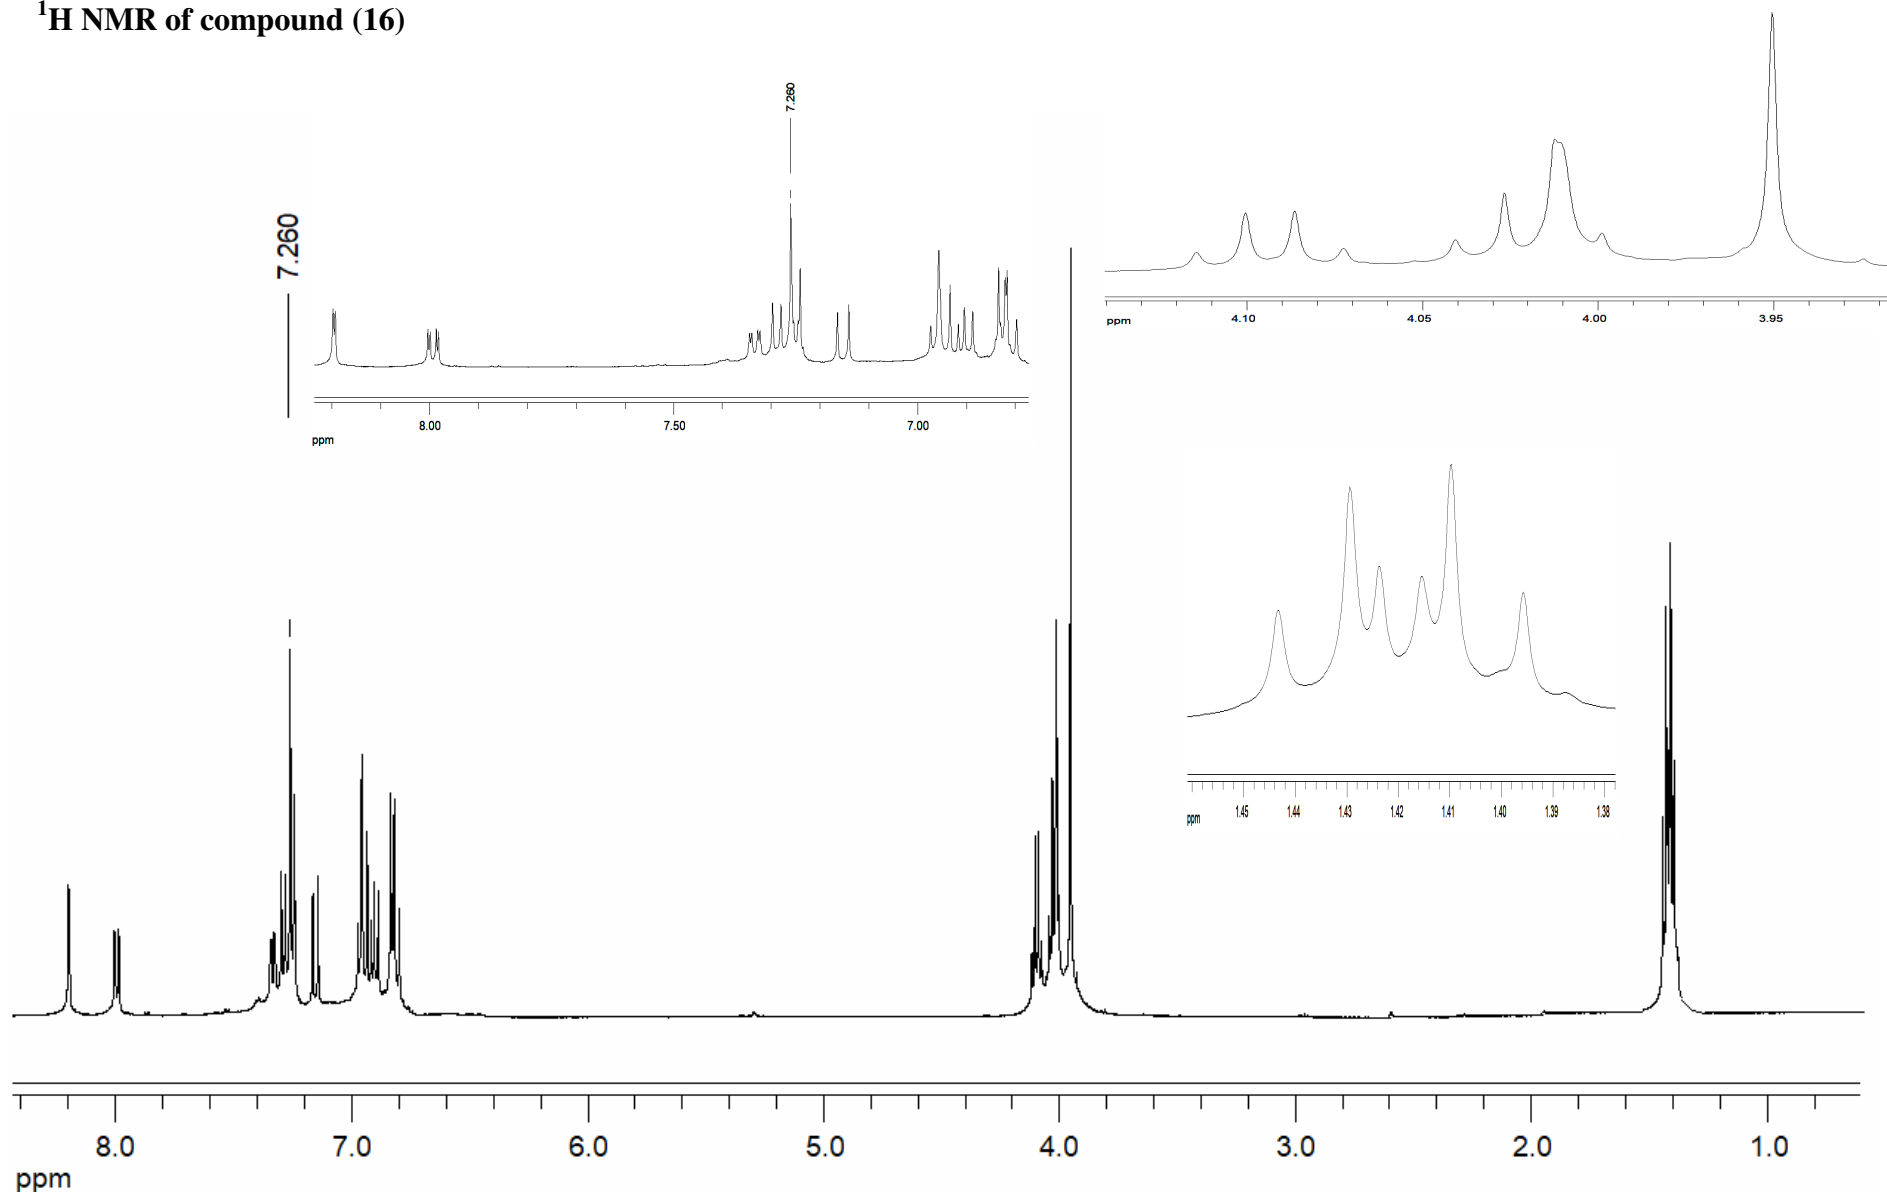

<sup>13</sup>C NMR of compound (16)

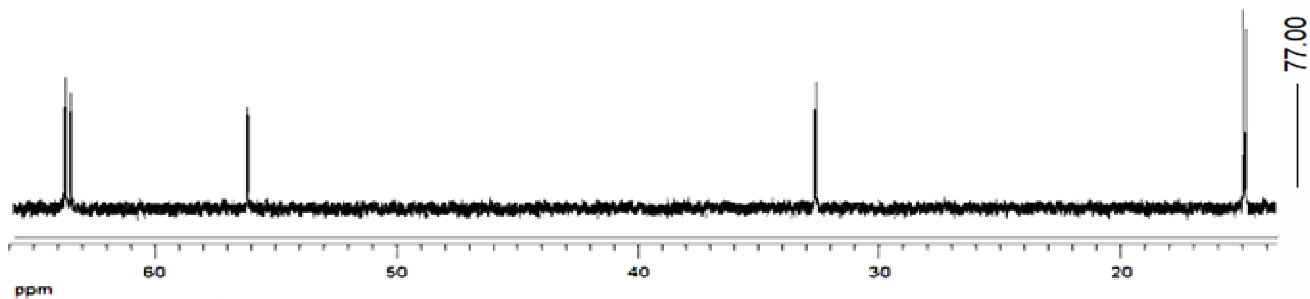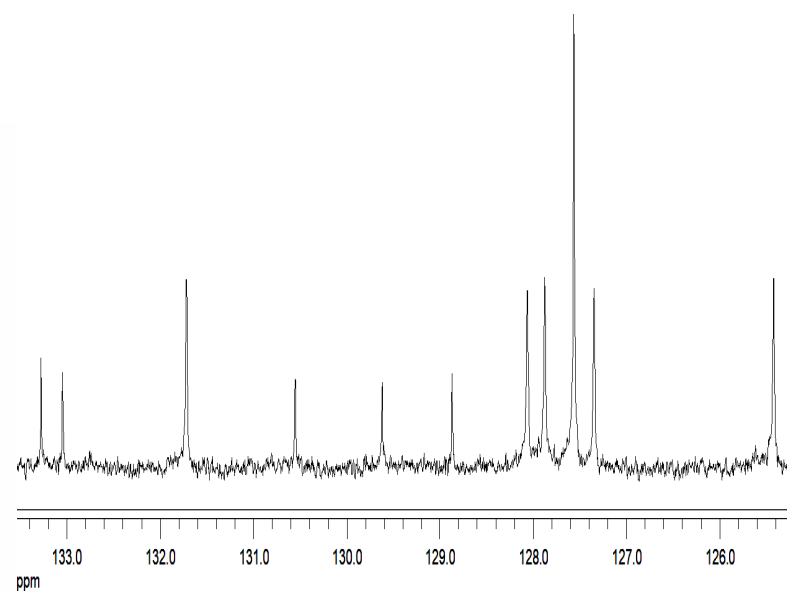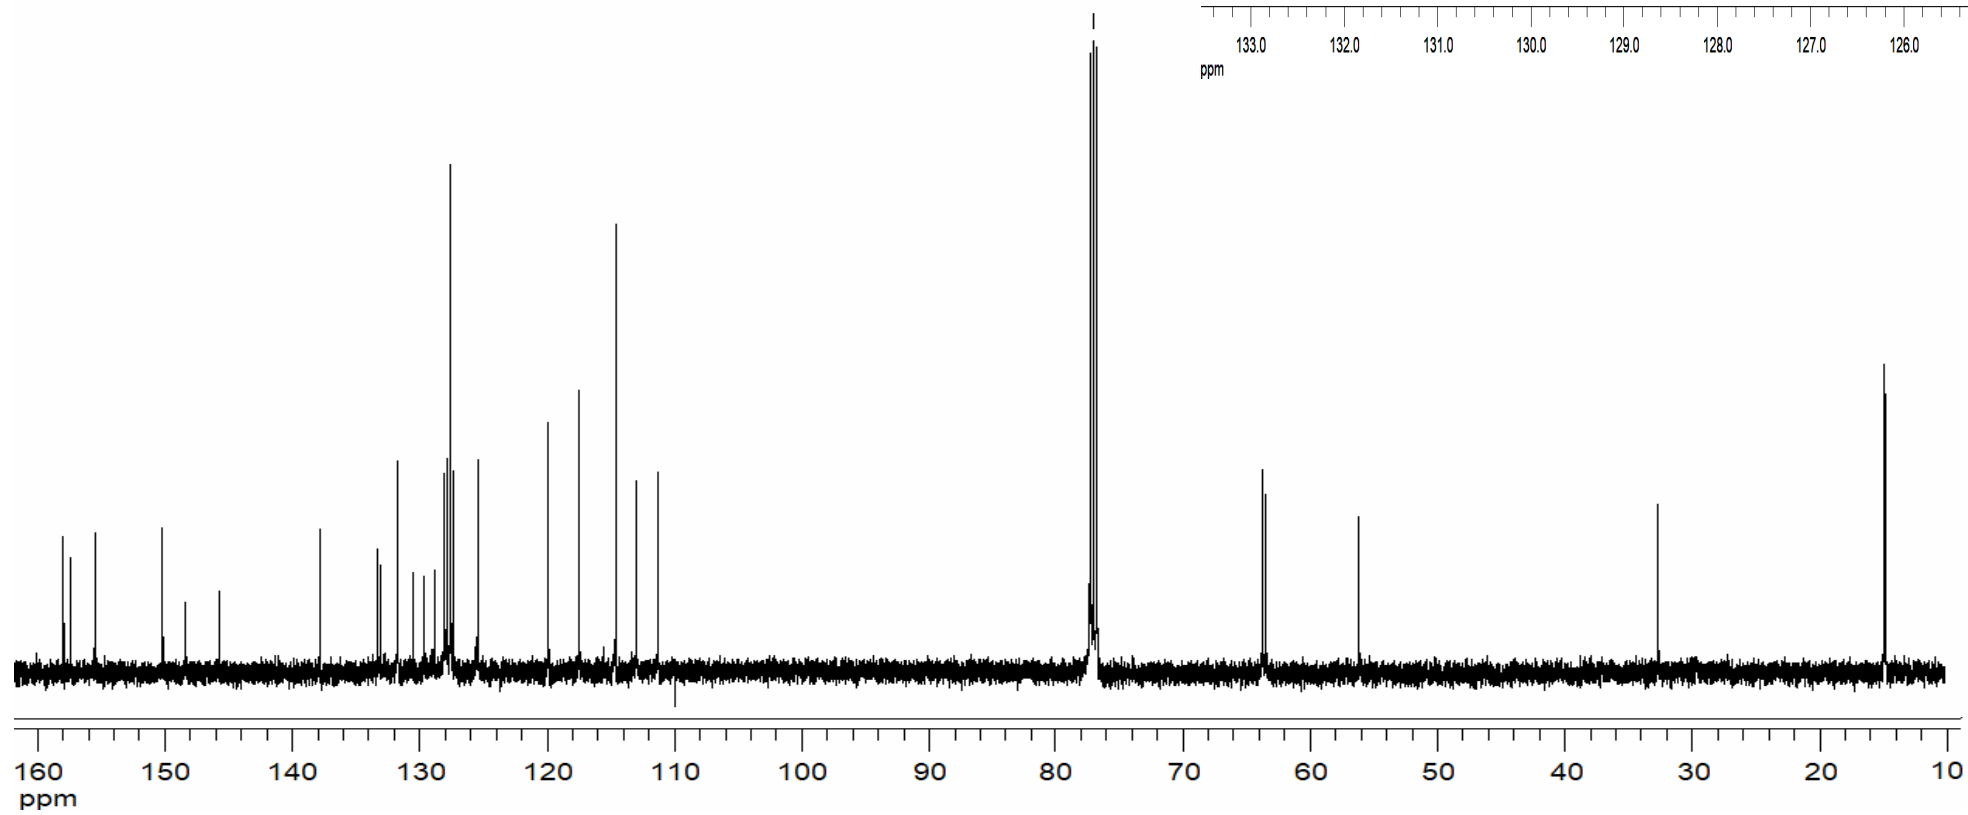

Supplement: c8ra04249g1.pdf [file c8ra04249g1.pdf]
